1 **Transcriptome analysis of apple leaves infected by the rust fungus**  
2 ***Gymnosporangium yamadae* at two sporulation stages (spermogonia and**  
3 **aecia) reveals specific host responses, rust pathogenesis-related genes and**  
4 **a shift in the phyllosphere fungal community composition**

5  
6 Si-Qi Tao<sup>1,2</sup>, Lucas Auer<sup>2</sup>, Emmanuelle Morin<sup>2</sup>, Ying-Mei Liang<sup>3\*</sup>, Sébastien Duplessis<sup>2\*</sup>

7  
8 <sup>1</sup> The Key Laboratory for Silviculture and Conservation of Ministry of Education, Beijing Forestry  
9 University, Beijing 100083, China

10 <sup>2</sup> Université de Lorraine, Institut National de la Recherche Agronomique, Unité Mixte de Recherche  
11 1136 Interactions Arbres-Microorganismes, Champenoux, France

12 <sup>3</sup> Museum of Beijing Forestry University, Beijing Forestry University, Beijing 100083, China

13  
14 Correspondence: Ying-Mei Liang, [liangym@bjfu.edu.cn](mailto:liangym@bjfu.edu.cn); Sébastien Duplessis,  
15 [sebastien.duplessis@inra.fr](mailto:sebastien.duplessis@inra.fr)

16  
17 **Abstract**

18 Apple rust disease caused by *Gymnosporangium yamadae* is one of the major threats to  
19 apple orchards. In this study, dual RNA-seq analysis was conducted to simultaneously  
20 monitor gene expression profiles of *G. yamadae* and infected apple leaves during the  
21 formation of rust spermogonia and aecia. The molecular mechanisms underlying this  
22 compatible interaction at 10 and 30 days post inoculation (dpi) indicate a significant  
23 reaction from the host plant and comprise detoxication pathways at the earliest stage and  
24 the induction of secondary metabolism related pathways at 30dpi. Such host reactions  
25 have been previously reported in other rust pathosystems and may represent a general  
26 reaction to rust infection. *G. yamadae* transcript profiling indicates a conserved genetic  
27 program in spermogonia and aecia that is shared with other rust fungi, whereas secretome  
28 prediction reveals the presence of specific secreted candidate effector proteins expressed  
29 during apple infection. Unexpectedly, the survey of fungal unigenes in the transcriptome  
30 assemblies of inoculated and mock-inoculated apple leaves reveals that *G. yamadae*  
31 infection modifies the fungal community composition in the apple phyllosphere at 30 dpi.  
32 Collectively, our results provide novel insights into the compatible apple-apple rust  
33 interaction and advance the knowledge of this heteroecious demicyclic rust fungus.

34  
35 **Keywords:** Dual RNA-seq, Pucciniales, plant secondary metabolism, obligate biotrophy,  
36 secreted proteins, microbiome

## 37 Introduction

38 Apple (*Malus domestica* Borkh.), one of the major fruitful and economic fruiters in  
39 temperate regions of the world, is susceptible to the rust pathogen *Gymnosporangium*  
40 *yamadae* (Cummins and Hiratsuka 2003; Kern 1973; Peterson 1967). Heavy infection can  
41 lead to significant decreases in fruit yield and economic losses in most apple-planting  
42 regions in Asia (Kim and Kim 1980; Wang et al. 2010). As a heteroecious and demicyclic  
43 rust fungus, *G. yamadae* produces four morphologically different spores on two  
44 taxonomically different hosts (*Malus* spp. and *Juniperus chinensis*) to complete its life  
45 cycle (Kern et al. 1973; Yun et al. 2005). In early spring, telia germinate and produce  
46 gelatinous tendrils containing haploid basidiospores which can disperse into the air. The  
47 released spores parasitized the surface of *Malus* leaves and successful infection leads to  
48 orange-yellow spots on the upper surface. Then the spots turn to bright orange-red with a  
49 red border and may exhibit small raised black dots in the centre of the spots. These lesions  
50 grow through the leaf and develop small brownish and spiky projections on the lower  
51 surface of leaf (Cummins and Hiratsuka 2003).

52 In Asia, junipers are widely cultivated and frequently found in graveyards, parks and  
53 roadsides. Trans-provincial transportation of juniper seedlings with overwintering fungal  
54 infections increases the risk of disease occurrence (Tao et al. 2018). Twenty *Malus* spp.  
55 have been tested for disease resistance and only *M. halliana* showed high resistance to  
56 *G. yamadae* basidiospores, the others all are highly susceptible (Harada 1984). To control  
57 this disease, protective fungicides are applied on apple leaves to prevent penetration of  
58 basidiospores into the host (Guo 1994), and the control efficiency is influenced by the  
59 spraying timing. Still, no effective management strategy has been established because  
60 the molecular mechanisms underlying the apple-apple rust interaction has not been  
61 investigated, and the fungal parasitic factors still remain unknown.

62 In the past few years, transcriptomic and bioinformatic approaches have allowed the  
63 identification of candidate virulence factors of many rust fungi at different infection or life-  
64 cycle stages (Lorrain et al. 2019). Similarly, efforts have been made for the identification  
65 of host defense mechanisms activated in response to rust infection at a transcriptomic  
66 scale (Rinaldi et al. 2007; Schneider et al. 2011; Ullah et al. 2019; van de Mortel et al.  
67 2007). Dual RNA-seq has been applied to simultaneously detect gene expression  
68 changes in both host and pathogens, including plant-rust fungi interactions (Dobon et al.  
69 2016; Fernandez et al. 2012; Kawahara et al. 2012; Teixeira et al. 2014; Westermann et  
70 al. 2017). Such studies provided invaluable resources to help identifying host molecular  
71 alterations during direct fungal action and better understand the strategies used by the  
72 pathogen to manipulate the host during the infection process.

73 In addition to pathogenic fungi, the plant phyllosphere harbours large numbers of  
74 other microbiota, such as bacteria, non-pathogenic fungi and archaea (Lindow et al. 2003;  
75 Vorholt 2012). Among these microbiotas, some play a direct role in protecting their host  
76 against pathogens (Hassani et al. 2018). Massive parallel sequencing technologies are  
77 remarkable tools to describe the in-depth composition and structure of microbial

78 communities associated with leaves of many plants, including apple (Agler et al. 2016;  
79 Becker et al. 2008; Camatti-Sartori et al. 2005; Leveau and Tech 2011; Reisberg et al.  
80 2012). However, the systematic exploration of phyllosphere fungal communities remains  
81 limited and only a few reports have shown the microbes from the plant phyllosphere could  
82 play an important role in resistance to pathogens (Busby et al. 2016; Hassani et al. 2018;  
83 Ritpitakphong et al. 2016; Vogel et al. 2016). The study of microbiome in the plant  
84 phyllosphere during rust infection is barely explored (Busby et al. 2016).

85 In this study, we conducted a dual RNA-seq analysis of apple leaves inoculated with  
86 the rust fungus *G. yamadae* at two time points, 10 days post inoculation (10 dpi) and 30  
87 days post inoculation (30 dpi), compared to mock-inoculated treatment. We aimed to  
88 explore the host responses to *G. yamadae* infection and to identify rust genes expressed  
89 during the interaction with apple leaves, with an emphasis on secreted proteins which may  
90 relate to pathogenicity. We also report on the impact of *G. yamadae* infection on fungal  
91 communities of the apple phyllosphere.

92

## 93 **Results**

### 94 **Experimental design and RNA-seq results**

95 Apple rust spermogonia and aecia were collected from leaves of two-year-old apple  
96 seedlings inoculated with *G. yamadae* basidiospores after 10 days post-inoculation (dpi)  
97 and 30 dpi, respectively (Figure 1). Control mock-inoculated treatments with sterile water  
98 were obtained from plants grown in strictly similar conditions at 10 and 30 dpi  
99 (Supplementary file: Figure S1). Three biological replicates were collected for each  
100 sample. The collected inoculated samples included the fungal sporulation structures and  
101 the leaf area discoloured during the fungal infection as visible on Figure 1. Leaf samples  
102 of similar area were collected for the mock-inoculated controls. To ensure the production  
103 of the two fungal sporulation structures targeted in this study, the infection procedure  
104 requires to keep the two-year-old apple seedlings bagged for 10 days in controlled green-  
105 house conditions before to move them outdoors until 30 days and aecia differentiation.  
106 This experimental set-up allows for direct comparisons between inoculated and mock-  
107 inoculated samples at the two stages, but environmental effects do not allow for direct  
108 comparison between time points.

109 Total RNA for each replicate was isolated and sequenced using Illumina Hiseq platform  
110 and subjected to a dedicated analysis pipeline (Supplementary file: Figure S2). After  
111 removing reads of low quality, 264 and 269 million paired clean reads were obtained for  
112 infected apples leaves, and 194 and 151 million clean reads from healthy leaves, at 10dpi  
113 and 30dpi, respectively (Table 1). Paired-end reads were aligned to the *M. domestica*  
114 reference genome (Velasco et al. 2010) using Tophat v.2.0.12 (Trapnell et al. 2009) and  
115 the mapped rates are relatively lower in infected leaves than in healthy leaves and even  
116 lower at 30dpi (24.68% for average), which reflects the development of the rust pathogen  
117 inside the infected leaves (Table 1). Pearson correlation coefficients ( $r^2$ ) were calculated  
118 between biological replicates and conditions to assess the overall reproducibility of the

119 data (Figure 2A). The results showed a strong correlation between replicates of a single  
120 condition, and a clear separation between independent conditions (Figure 2A). The  
121 principal components analysis based on read counts confirmed the distinction of  
122 expression profiles of inoculated and mock inoculated samples at the two time points and  
123 the proximity of biological replicates (Figure 2B).

124 After mapping the Illumina reads onto the 57,386 predicted genes in the apple genome  
125 (Velasco et al. 2010), 26,530 and 29,227 transcripts were identified from inoculated and  
126 mock inoculated conditions at 10 dpi, respectively. Besides, 29,725 and 26,867 transcripts  
127 were found in inoculated and mock inoculated conditions at 30 dpi, respectively  
128 (Supplementary file: Table S1). Reads unmapped to the apple genome in each inoculated  
129 condition were pooled and assembled using *de novo* assembly Trinity (Grabherr et al.  
130 2011) and fragments per kilobase of transcript sequence per millions base pairs  
131 sequenced (FPKM) values were calculated for all assembled unigenes. In order to identify  
132 apple rust transcripts in absence of a reference genome for *G. yamadae*, these tentative  
133 fungal unigenes were compared to reference basidiomycete genomes, including four rust  
134 species and 97,034 Pucciniales ESTs. In total, 30,293 and 22,717 unigenes were  
135 considered as *G. yamadae* transcripts expressed in infected apple leaves at the  
136 spermatogonial and aecial stage, respectively (Supplementary file: Figure S2, Table S2).  
137 After assignment of unigenes to the plant host and to the rust fungus, we considered  
138 unassigned reads and compared them to the NCBI database, revealing the presence of  
139 many fungal sequences belonging to the Ascomycota (data not shown). This observation  
140 prompted us to explore the fungal community composition in the apple phyllosphere in  
141 more details.

142

### 143 **Apple leaves transcriptional changes upon *G. yamadae* infection**

144 The four transcriptomes obtained in this study were compared to investigate specific  
145 gene expression profiles in apple leaves during infection by *G. yamadae* at the  
146 spermatogonial and aecial stages. A total of 34,246 transcripts (59.7% of *M. domestica*  
147 genes) were expressed at least in one condition, and 22,167 (38.6%) transcripts were  
148 expressed in all conditions. We found 300 (0.9%) transcripts exclusive of the inoculated  
149 conditions and 256 (0.7%) of the mock inoculated conditions, whereas a total of 1,115  
150 (3.3%) genes were only expressed at 10 dpi and 1,283 (3.7%) at 30 dpi (Figure 3). To  
151 explore the molecular mechanisms triggered in response to *G. yamadae* infection,  
152 pairwise comparisons of the host plant transcriptomes were conducted between  
153 inoculated and mock inoculated apple leaves at the two time points and transcripts  
154 showing significant levels of expression regulation ( $p_{adj} \leq 0.05$ ) were regarded as  
155 differentially expressed genes (DEGs). The comparisons between inoculated and mock  
156 inoculated apple leaves generated 13,961 DEGs at 10 dpi (7,784 up-regulated and 6,177  
157 down-regulated) and 4,428 at 30 dpi (2,883 up-regulated and 1,545 down-regulated)  
158 (Supplementary file: Table S1, Figure 4). Hierarchical clustering of DEGs showed dynamic  
159 expression profiles at the two infection stages in this compatible apple-apple rust

160 interaction (Figure 4). Among these DEGs, 579 and 291 were respectively up-regulated  
161 and down-regulated in response to the infection of *G. yamadae*, representing *G. yamadae*  
162 infection-related DEGs (Figure 4). Among highly induced apple transcripts in infected  
163 leaves at 10 dpi, 56 unigenes encoding glutathione S-transferase (GST) showed a fold-  
164 change up to 194, among which 23 had a fold-change over 10, whereas only 14 GSTs  
165 were up-regulated at 30 dpi with a fold-change ranging from 3 up to 27 (Supplementary  
166 file: Table S1). In total, 12 GST transcripts were induced both at 10 and 30 dpi. Interestingly,  
167 eight mannitol dehydrogenase-encoding genes were also among highly induced  
168 transcripts at 10 dpi (fold-change up to 231) while no significant change was observed at  
169 30dpi. Several gene functions related to cell-wall, phytohormones, or response to  
170 pathogens were found among the top highly expressed DEGs at 10 and 30 dpi (Table 2).

171

### 172 **Impact of rust infection on metabolic pathways in apple leaves**

173 In order to determine the impact of the rust infection on metabolic pathways of apple  
174 leaves, we performed classification of DEGs into cellular categories using MapMan and  
175 KEGG and performed enrichment analysis. All DEGs were integrated into MapMan plant  
176 categories and 52 and 56% of them were classified into 28 functional categories at 10 and  
177 30 dpi, respectively (Figure 5A; Supplementary file: Table S1). The direct comparison of  
178 proportions of up- and down-regulated transcripts assigned to Mapman categories helped  
179 to draw major inflexion in metabolic pathways. For instance, photosynthesis processes  
180 were remarkably represented among the down-regulated transcripts at the two time points.  
181 Conversely, cellular respiration was more represented among induced transcripts at both  
182 time points in infected apple leaves (Supplementary file: Table S1, Figure 5A). Interestingly,  
183 the solute transport category was proportionally more abundant in both up- and down-  
184 regulated transcripts at 10dpi, indicating that this process might be particularly dynamic at  
185 the spermogonia infection stage. Similarly, the RNA trafficking category was also more  
186 represented in up- and down-regulated transcripts at 30 dpi, suggesting a highly dynamic  
187 regulation of this process at the aecial stage. The phytohormones and cell wall categories  
188 were also more represented among transcripts up-regulated at 10 dpi, and the vesicle  
189 trafficking category was more prominent at 30dpi among up-regulated transcripts (Figure  
190 5A). Almost all the genes falling in the MapMan photosynthesis-related apparatus  
191 category (Photosystem I, Photosystem II, ATP synthase, Redox chain, Photorespiration  
192 and Calvin cycle) were significantly down-regulated in infected leaves at the two time  
193 points (Figure 5B).

194 All DEGs were also classified into Kyoto Encyclopedia of Genes and Genomes (KEGG)  
195 pathways and an enrichment analysis between inoculated and mock inoculated groups  
196 was performed for down- and up-regulated transcripts. In total, 3,090 and 715 down-  
197 regulated transcripts were classified into 124 and 85 KEGG pathways, at 10 dpi and 30  
198 dpi respectively; whereas 4,133 and 1,493 up-regulated transcripts were classified in 122  
199 and 112 KEGG pathways at 10 and 30 dpi, respectively (Supplementary file: Table S1).  
200 Consistent with the MapMan annotation results, photosynthesis related pathways were



201 among the most significant down-regulated pathways at both time points, including  
202 biosynthesis of light-harvesting chlorophyll protein complex (LHC) in antenna proteins,  
203 impaired processes of Photosystem I, Photosystem II, and Cytochrome b6/f complex  
204 (Supplementary file: Table S1). Glutathione metabolism, endocytosis and amino sugar and  
205 nucleotide sugar metabolism categories were significantly enriched among up-regulated  
206 transcripts at 10 dpi (Figure 6). At 30 dpi, the three most significantly enriched pathways  
207 were flavonoid biosynthesis; stilbenoid, diarylheptanoid and gingerol biosynthesis; and  
208 phenylpropanoid biosynthesis (Figure 6). Interestingly, many other pathways directly  
209 related to plant secondary metabolism such as phenylalanine metabolism or biosynthesis  
210 of secondary metabolites, were found among significantly enriched KEGG categories at  
211 this time points. Categories related to aromatic and volatile compounds or to tyrosine  
212 metabolism and tyrosine-derived alkaloids were also significantly enriched at 30 dpi.  
213 Altogether, these results point out important modifications in leaf composition. Interestingly,  
214 the plant-pathogen interaction pathway was significantly induced during infection at 10 dpi  
215 but repressed at 30 dpi (Figure 6; Supplementary file: Table S1). Overall, the survey of  
216 functional categories expressed in apple leaves in response to *G. yamadae* infection  
217 indicates that even if a compatible interaction is established by the rust fungus during its  
218 biotrophic growth, a remarkable reaction is noticeable in the leaf tissues on the host side,  
219 particularly with the expression of functions related to secondary metabolism and plant-  
220 pathogen reactions, as early as 10 dpi, and more marked by 30 dpi in inoculated compared  
221 to mock-inoculated conditions.

222

### 223 **G. *yamadae* spermogonia and aecia expressed genes**

224 The average length of the unigenes assigned to the rust fungus in spermogonia and aecia  
225 are respectively of 1,622-bp and 1,956-bp and the largest proportion of unigenes, with  
226 19,589 (64.67%) and 16,867 (74.25%) at 10 and 30 dpi respectively, exhibits a size larger  
227 than 1kb, indicating the good quality of the reads assembly into fungal unigenes  
228 (Supplementary file: Figure S3). Comparison of the fungal unigenes to the NCBI-nr,  
229 Swissprot and KOG databases provided putative annotation support for 17,951 (59.3%)  
230 spermogonia unigenes and 17,515 (77.1 %) aecia unigenes. Among them, 7,647 and  
231 9,059 unigenes showed homology to genes of the wheat leaf rust fungus *Puccinia*  
232 *graminis* f. sp. *tritici* and 2,072 and 2,557 unigenes showed homology to genes of the  
233 poplar rust fungus *Melampsora larici-populina*. Among the 26 and 23 most highly  
234 expressed unigenes (FPKM value > 1000) in spermogonia and aecia, respectively, more  
235 than half are hypothetical proteins or without any hit in the nr database (Table 3). Beyond  
236 that, we identified transcripts encoding secreted proteins, polyubiquitin-A and a  
237 pheromone precursor highly expressed in spermogonia, and transcripts encoding  
238 secreted proteins and a thiazole biosynthetic enzyme highly expressed in aecia (Table 3).  
239 Like in other rust fungi, many highly expressed rust transcripts are of unknown function.  
240 These molecular determinants are conserved across rust species and may play an  
241 important role in pathogenesis-related processes.

242

## 243 **Prediction of in planta secreted proteins expressed by *G. yamadae* during apple leaf** 244 **infection**

245 Rust fungi possess very large repertoires of secreted proteins (SPs) that contain effectors,  
246 which have significant roles in the establishment of compatible interactions with their host  
247 plants (Lorrain et al. 2019). We predicted 38,039 and 29,160 proteins from *G. yamadae*  
248 spermogonia and aecia unigenes, respectively. Based on a dedicated bioinformatic  
249 pipeline, we identified 978 (2.6%) and 1,091(3.7%) secreted proteins (SPs)  
250 (Supplementary file: Table S2). In detail, the 978 spermogonia SPs contain 219  
251 carbohydrate active-enzymes (CAZymes), 75 proteases and 11 lipases, and five of these  
252 SPs were highly expressed at this stage (FPKM value > 1000) including the transcript  
253 exhibiting the highest expression level (Cluster-3395.52629) (Supplementary file: Table  
254 S2). Among the 1,091 SPs predicted in aecia, 246, 57 and 10 proteins were classified into  
255 CAZymes, proteases and lipases, respectively. Four SPs showed a high expression levels  
256 at the aecial stage (FPKM>1000) (Supplementary file: Table S2). Predicted proteins from  
257 spermogonia and aecia were compared to proteins previously identified in *G. yamadae*  
258 telia (Tao et al. 2017) with a Markov Cluster Algorithm (MCL) analysis in order to identify  
259 proteins specific of apple infection stages (Supplementary file: Table S2). In total, 1,097  
260 MCL protein families with a total of 3,584 proteins, only contained proteins from  
261 spermogonia and aecia (1,831 and 1,753, respectively) and are considered specific of  
262 apple infection. Besides, 2,202 MCL protein families with a total of 2,704 proteins (7.1%  
263 of 38,039 predicted proteins in spermogonia) were identified as specific of the  
264 spermogonia stage. Among these proteins, 45 were predicted as SPs. Furthermore, 1,322  
265 protein families with a total of 1,801 proteins (6.2% of 29,160 predicted proteins in aecia)  
266 were specific to the aecia stage, including 50 SPs (Supplementary file: Table S2). Among  
267 spermogonia and aecia predicted SPs, six showed homology to the rust transferred  
268 protein 1 (RTP1), initially described in *Uromyces* spp. (Kemen et al. 2005) and since  
269 shown as conserved across all rust fungi (Lorrain et al. 2019; Pretsch et al. 2013). The six  
270 amino acid sequences ranged between 170 to 260 residues, and a sequence alignment  
271 with 13 RTP homologues from seven different rust fungi showed relatively conserved  
272 regions in the C-terminal second half of the protein with conserved cysteine positions  
273 along the sequence (Figure S4). Interestingly, *Gymnosporangium* spp. RTP homologs  
274 clustered in two different groups, one specific of the genus with *Gymnosporangium*  
275 *sabinae* and another with *Hemileia vastatrix*, the coffee rust fungus, distinct from RTPs  
276 from Pucciniaceae (*Uromyces* spp.) and Melampsoraceae (Figure S4). This result  
277 indicates the presence of an ancestral and conserved rust SP multigene families for RTP  
278 in *Gymnosporangium* spp. and the expression of distinct sets of SPs -i.e. likely candidate  
279 apple rust effectors- at specific infection stages.

280

281

282

283 **Functional distribution of *G. yamadae* unigenes during the interaction with the two**  
284 **host plants, apple and juniper**

285 *G. yamadae* unigenes from spermogonia and aecia were annotated in the Eukaryotic  
286 orthologous group (KOG) database. In total, 16,458 (54.33%) and 11,299 (49.74%)  
287 unigenes showed homology in the KOG database (Supplementary file: Table S2) and the  
288 functional categories were compared to the distribution previously reported for the telial  
289 stage on juniper tree (Tao et al. 2017). Excluding the category of "unknown function" and  
290 "General function prediction only", the most abundant KOG categories corresponded to  
291 "posttranslational modification, protein turnover, chaperones" at all three stages. The KOG  
292 categories showed similar distribution across the different fungal stages, although in each  
293 KOG category the unigenes are more abundant in spermogonia and aecia. A "secreted  
294 proteins" category corresponding to SP of unknown function was included in the KOG  
295 annotation, and the genes falling into this category were much abundant in telia and aecia  
296 than in spermogonia (Supplementary file: Figure S5). Although we do not have a reference  
297 genome for *G. yamadae* and as such, we cannot accurately estimate the extent of each  
298 transcriptome completeness, this comparison suggests that similar genetic programs are  
299 expressed on the different host plants at distinct sporulation stages, with the concomitant  
300 expression of specific genes in distinct categories to achieve specific host infection and/or  
301 fungal sporulation related processes.

302

303 **Infection of *G. yamadae* modifies the composition of fungal communities in the**  
304 **apple phyllosphere**

305 Unexpectedly, beyond the apple and rust transcripts, we noticed a large number of  
306 unigenes showing homology with other fungi, particularly ascomycetes. Since these  
307 sequences were also present in controlled apple leaves, they most likely correspond to  
308 resident fungal communities on or inside the leaves of the two-year-old apple seedlings  
309 used in our experimental set-up. We used a dedicated meta-transcriptomic approach to  
310 detail the fungal communities present in inoculated and in mock inoculated apple leaves  
311 at 10 and 30 dpi (Supplementary file: Figure S2). The clean reads from the 12 Illumina  
312 libraries that did not mapped onto the *M. domestica* genome were assembled together  
313 into 64,637 unigenes. Then the clean reads from each sample were assigned to these  
314 unigenes and annotated by comparison to all fungal genomes available in the MycoCosm  
315 at the Joint Genome Institute (JGI) to know the detailed fungal composition in each sample.  
316 The unigenes that did not match to MycoCosm were compared to NR at NCBI to determine  
317 their taxonomical origin. The Table S3 details the number of total and fungal unigenes  
318 found in each sample replicate. As expected, the fungal unigenes are predominant in  
319 inoculated conditions and proportionally, the fungal reads are more important at the aecial  
320 stage at 30 dpi (Figure S6). Unigenes of metazoan origin were limited in all samples and  
321 unigenes assigned to Viridiplantae still constituted the largest proportion in the control  
322 conditions and a small portion of the inoculated conditions. These sequences of plant  
323 origin that did not mapped to the apple genome may represent specific or divergent



324 sequences from the Chinese genotype used in the study compared to the reference apple  
325 genome (Figure S6). As expected, the major part of the fungal communities in infected  
326 apple leaves are Pucciniales, with homology to *Puccinia* spp., *Melampsora* spp. and  
327 *Cronartium* spp. (Figure 7A). The average relative abundance of rust fungi is 56.5% at 10  
328 dpi and it increases to 76.5% at 30 dpi, reflecting the increase of *G. yamadae* biomass at  
329 30 dpi (Supplementary file: Table S3). The distribution of reads into other fungal  
330 taxonomical groups is relatively similar at all stages with the exception of the inoculated  
331 stage at 30 dpi. This different distribution is better illustrated after the removal of the reads  
332 assigned to rust fungi (Figure 7B). Unigenes with homology to *Macroventuria* spp.,  
333 *Alternaria* spp., *Didymella* spp., *Ascochyta* spp. and *Boeremia* spp. from the Pleosporales  
334 order and *Lizonia* spp. were the most abundant in the mock-inoculated conditions at 10  
335 and 30 dpi, as well as in the inoculated condition at 10 dpi. Strikingly, in the inoculated  
336 condition at 30 dpi, there is a complete shift in the fungal community composition. This  
337 aecial infection stage is marked by a large dominance of *Alternaria* spp. and *Fonsecaea*  
338 spp., whereas the other abundant ascomycetes from the Pleosporales found in the control  
339 conditions and in the inoculated condition at 10 dpi are almost absent (Figure 7B).  
340 Interestingly, a series of less represented fungal species are present in all samples and  
341 less influenced by *G. yamadae* infection (Figure 7B, Supplementary file: Table S3). This  
342 result shows that the progression of the rust disease in inoculated apple leaves strongly  
343 impacts the phyllosphere fungal community.

344

## 345 Discussion

346 The leaf rust disease caused by the biotrophic fungus *G. yamadae* can generate  
347 substantial injuries to apple trees and result in lower fruit quality (Wang et al. 2010), and  
348 so far, there is scarce information about the molecular processes underlying the apple-  
349 apple rust interaction (Lu et al. 2017). RNA-seq has facilitated simultaneous detection of  
350 gene expression for host plants and pathogens in various pathosystems, providing new  
351 insights into understanding disease processes (Westermann et al. 2017). Availability of  
352 the apple reference genome makes it possible to monitor the transcripts expressed in  
353 infected apple leaves (Velasco et al. 2010). In the present study, we used a dual RNA-seq  
354 approach to monitor the transcriptome of apple leaves during disease progression in a  
355 compatible interaction with the rust fungus *G. yamadae* and to identify fungal genes  
356 related to pathogenesis.

357 Rust fungi are obligate biotrophs that establish compatible interactions to derive nutrients  
358 from their hosts (Kemen et al. 2015; Lorrain et al. 2019). In this relationship, the plant is  
359 maintained alive and the rust fungus proliferates forming specific infection structures  
360 called haustoria and later on spores that ensure propagation in the life cycle. The haustoria  
361 are formed at early stages, from which the fungus release effector proteins to interfere  
362 with the host physiology (Petre et al. 2014). From the same structures, nutrients are  
363 channelled to the fungus through specific transport systems (Struck 2015; Voegelé et al.  
364 2009). During the whole infection process, the host immunity is ineffective against the

365 invading rust fungus, contrary to incompatible plant-rust fungus interactions that are  
366 marked by strong and early defense reactions through the specific detection of pathogen  
367 molecular determinants (Duplessis et al. 2009; Rinaldi et al. 2007). However, at late stages  
368 of compatible interactions, infected leaf tissues can present physiological reactions to rust  
369 infection during sporulation (Duplessis et al. 2009; Miranda et al. 2007; Ullah et al. 2017).

370

### 371 **The compatible interaction established by *G. yamadae* with apple leaves induces** 372 **marked reactions including alteration of secondary metabolism pathways**

373 Glutathione (GSH) is a tripeptide in plants playing important roles in defense reactions to  
374 pathogens, including detoxification of reactive oxygen species, regulation of formation of  
375 phytoalexin and degradation of various toxic substances through the catalyzing by GSTs  
376 (Gullner et al. 2018). In the present study, Glutathione pathway was highly enriched in  
377 inoculated apple leaves at 10 dpi according to the KEGG pathway enrichment analysis,  
378 and consistent with that, large number of GSTs encoding genes were highly induced at  
379 early infection time. Similar observations have been made during infection of poplar leaves  
380 by the rust fungus *M. larici-populina* in the frame of an incompatible interactions at early  
381 time points (2 days post-inoculation) (Rinaldi et al. 2007). Regulation of GST genes  
382 expression was also observed at later time points in compatible poplar-poplar rust  
383 interactions (Azaiez et al. 2009; Miranda et al. 2007). GSTs form a widespread and  
384 ubiquitous superfamily of plant genes, with specific expansions in trees (Lallemand et al.  
385 2014; Pégeot et al. 2014). These enzymes have various and specific roles, some being  
386 associated to the response to rust infection (Duplessis et al. 2009; Pégeot et al. 2014).  
387 The high expression of GST genes in apple leaves may be required for detoxication of  
388 compounds accumulated during early rust infection. Beyond glutathione, the amino sugar  
389 and nucleotide sugar metabolism (ANM) pathway was also significantly enriched in  
390 infected apple leaves at 10 dpi. The products of ANM has many roles in plants, such as  
391 maintaining and repairing damaged cell walls during pathogen infection through  
392 biosynthesis of nucleotide sugar units which are components of the primary and  
393 secondary cell walls (Burton et al. 2010; Josè-Estanyol and Puigdomènech 2000; Wang  
394 et al. 2011; Wolf et al. 2012). Moreover, UPD-glucose, another important metabolite of the  
395 ANM pathway, can also be a substrate involved in callose biosynthesis (Chen and Kim  
396 2014). Callose is widespread in higher plants and it plays important roles during plant  
397 development or in response to multiple stresses, especially to the infection of pathogens  
398 like rust fungi (Stone and Clarke 1992). The enhanced ANM metabolic pathway in *G.*  
399 *yamadae* infected apple leaves at 10 dpi may indicate that cell wall modification is part of  
400 the response to rust invasion at early sporulation stage during compatible interaction.

401 Flavonoid, phenylpropanoid and stilbenes are antimicrobial secondary metabolites known  
402 as phytoalexins that have long been associated with plant resistance (Ahuja et al. 2012).  
403 At 30 dpi, up-regulated genes were remarkably enriched in phytoalexins biosynthesis  
404 pathways, similar to the findings of the transcriptome analysis of apple leaves in response  
405 to *Marssonina coronaria* infection (Xu et al. 2015). Flavonoids are a widely distributed

406 group of secondary metabolites in plants, including many components such as  
407 anthocyanidins, proanthocyanidins, flavanones and flavonols (Treutter 2006). The  
408 flavonoid composition positively influences the type of pigments displayed in rust infected  
409 leaves spots and the adjacent tissues, and the increased contents of flavonoid  
410 synchronized with spot expansion in apple leaves (Lu et al. 2017). Also, flavonoids  
411 biosynthesis and accumulation have been documented in poplar leaves after *Melampsora*  
412 spp. infection and biosynthesis is highly regulated by salicylic acid (Ullah et al. 2017; Ullah  
413 et al. 2019). Accumulation of proanthocyanidins and induction in expression of genes  
414 encoding enzymes involved in the synthesis of such condensed tannins were previously  
415 reported in several transcriptome analyses of compatible poplar-poplar rust interactions  
416 (Azaiez et al. 2009; Duplessis et al. 2009; Miranda et al. 2007). The over-representation  
417 of flavonoid biosynthesis pathways, secondary metabolism and pigment synthesis  
418 pathways correlates with the enlarged yellow- and red-coloured area noticeable around  
419 formation of aecia by the apple rust fungus at 30 dpi. The cumulated surface of such  
420 coloured area at the level of a single leaf can be remarkable and likely deeply alters the  
421 function of the leaves during successful disease establishment. However, it remains to be  
422 determined if this observation relates to a specific late defense reaction, for example  
423 through the loosening of the biotrophic control established by the rust fungus. It is worth  
424 to note that regulation of expression of secondary metabolism genes occurs at the  
425 uredinial sporulation stage in poplar, whereas it occurs at the aecial stage in apple leaves  
426 (Lu et al. 2017; Miranda et al. 2007; Ullah et al. 2017). No particular coloured reactions  
427 were noticeable on poplar leaves compared to apple leaves, however the time frames are  
428 different in these two different types of compatible interactions (one versus three weeks,  
429 for poplar uredinia and apple aecia, respectively). Altogether, our results and previous  
430 studies indicate that some of the plant responses to rust fungal infection are conserved  
431 independently of the stage or the type of rust life cycle (i.e. macrocyclic and demicyclic for  
432 the poplar rust and the apple rust fungi, respectively). Since the aecial stage is achieved  
433 on an alternate conifer host (larch) for the poplar rust fungus *M. larici-populina* (Lorrain et  
434 al. 2018), it would be particularly interesting to explore whether the secondary metabolic  
435 pathways show similar regulation patterns in different rust pathosystems based on plants  
436 belonging to different taxonomical groups (i.e. angiosperms versus gymnosperms).

437

#### 438 **Transcriptome profiling of *G. yamadae* reveals expression of a conserved rust** 439 **infection program and of specific in planta candidate effectors at two sporulating** 440 **stages**

441 The large genome size of *Gymnosporangium* spp. (Tavares et al. 2014) hinders  
442 sequencing in this genus. With further efforts to obtain a reference genome for this genus  
443 (Aime et al. 2017; [https://jgi.doe.gov/csp-2018-duplessis-reference-genomes-50-rust-](https://jgi.doe.gov/csp-2018-duplessis-reference-genomes-50-rust-fungi/)  
444 [fungi/](https://jgi.doe.gov/csp-2018-duplessis-reference-genomes-50-rust-fungi/)), the transcriptomes produced here and in a previous study (Tao et al. 2017) will be  
445 helpful to support genome annotation. In the absence of any supporting *G. yamadae*  
446 genome resource, a predictive annotation strategy relying on comparison to pre-existing

447 rust genes and transcripts in databases was built after an approach described for the  
448 coffee rust fungus *H. vastatrix* (Fernandez et al. 2012), and helped the identification of  
449 fungal unigenes from infected apple leaves. The prediction-based method most likely  
450 overestimates the unigenes numbers with some redundancy in the dataset when expected  
451 gene numbers in rust fungi are considered (Aime et al. 2017). Nevertheless, the  
452 expression levels of *G. yamadae* transcripts were particularly high at apple infection  
453 stages spermogonia and aecia, compared to those recorded in telia in infected juniper  
454 host (Tao et al. 2017), although the total unigenes numbers were in a similar range at  
455 these different sporulation stages. Similar to all rust genome and transcriptome reports  
456 up-to-now, most of the transcripts expressed in spermogonia and aecia do not have  
457 functional annotation and correspond to hypothetical or unknown proteins (Aime et al.  
458 2017).

459 As typical heteroecious rust fungi, *Gymnosporangium* spp. need two taxonomically  
460 unrelated hosts to complete their life cycle. The resolution of transcriptome profiles in  
461 alternate hosts has been only achieved in a few rust fungi so far (Cuomo et al. 2017; Liu  
462 et al. 2015; Lorrain et al. 2018) and the mechanisms underlying heteroecism remains  
463 largely unknown (Aime et al. 2017; Duplessis et al. 2014). Bioinformatic prediction  
464 pipelines have been used to predict rust secretomes and identify SPs representing  
465 candidate rust effectors (Lorrain et al. 2019; Sperschneider et al. 2017). The  
466 overrepresentation of specific SPs among *M. larici-populina* regulated genes during  
467 infection of its two different hosts suggests that such candidate effectors may underly  
468 establishment of compatible interactions with different host plants (Lorrain et al. 2018). In  
469 apple leaves infected by *G. yamadae*, higher proportions of SPs of unknown functions  
470 were identified in telia and aecia than in spermogonia. The expanded numbers of SPs in  
471 telia and aecia may relate to the potential roles of SPs in host alternation. *G. yamadae* SP  
472 gene families showing preferential expression during apple leaf infection in spermogonia  
473 or aecia represent priority apple rust candidate effectors for further functional  
474 characterization to understand their precise role in pathogenesis. Beyond specific *G.*  
475 *yamadae* SP genes, several rust-conserved SP genes were expressed during apple  
476 infection. The haustorially expressed SP RTP1 was firstly identified in *Uromyces fabae*  
477 and *U. striatus* in which it was shown to be transferred into the host cell (Kemen et al.  
478 2005). Since, many homologues of RTP1 were found in different rust fungi, establishing a  
479 conserved rust SP gene family (Fernandez et al. 2012; Pretsch et al. 2013; Puthoff et al.  
480 2008). Here, six unigenes retrieved in spermogonia and aecia define new members of this  
481 ancient rust SP family. The phylogeny of the RTP family shows the existence of a specific  
482 *Gymnosporangium* spp. RTP clade, which may indicate a specific evolution in this  
483 particular fungal family in the order Pucciniales.

484 The distribution of expressed unigenes of the apple rust fungus in functional KOG  
485 categories shows similar overall patterns in spermogonia and in aecia in apple tree, as  
486 well as in telia on the alternate host juniper. The same conclusion was reached for *M.*  
487 *larici-populina* on the two hosts, poplar and larch (Lorrain et al. 2018). These

488 transcriptomes studies suggest the expression of conserved molecular mechanisms in  
489 rust fungi during infection of different hosts and at different sporulation stages. Beyond the  
490 requirement of specific initial sets of effectors to bypass the host immune system, the  
491 redundant genetic programs underlying the biotrophic growth may explain why rust fungi  
492 can successfully infect taxonomically unrelated alternate host plants in a same life cycle.  
493 A more systematic survey of transcriptomes expressed in alternate hosts in different  
494 pathosystems established with rust fungi from different taxonomical families is needed to  
495 validate this hypothesis.

496

### 497 **The fungal community composition of the apple phyllosphere is altered by rust** 498 **infection**

499 Plant phyllosphere represents one of the largest habitats for diverse community of  
500 prokaryotic and eukaryotic microorganisms (Lindow et al. 2003). Some resident species  
501 are plant pathogens, but most microorganisms are non-pathogenic and have been shown  
502 to play a critical role in promoting plant growth and protecting plant against pathogens  
503 (Vorholt 2012). Plant growth-promoting microbes have attracted much attention in recent  
504 years, since understanding their roles in plant could be crucial in controlling disease  
505 severity. The fundamental roles of leaf-colonizing bacteria in plant-host fitness have been  
506 analysed to a great extent and fungal colonizers in the phyllosphere, like their bacterial  
507 counterparts, form diverse communities and have been shown to modify disease severity  
508 in their host plants through interacting with pathogens or activating plant defense  
509 mechanism (Arnold et al. 2002; Busby et al. 2015; Laforest-Lapointe et al. 2019). As plants  
510 are facing environmental stresses during their growth period, microbes from the  
511 phyllosphere are also exposed to many biotic and abiotic constraints, however, the impact  
512 of pathogens on fungal communities and diversity in the phyllosphere are largely  
513 underexplored. In our study, high-throughput RNA-seq has allowed to determine the  
514 fungal communities present inside or on the surface of the apple phyllosphere and to see  
515 how they are affected by *G. yamadae* infection. The fungal communities of infected and  
516 healthy apple leaves changed between 10 dpi and 30 dpi. Such changes may be due to  
517 the variation of environmental conditions (e.g. moving from indoor to outdoor in the  
518 procedure to obtain spermogonia and aecia) which may lead to changes in leaf  
519 metabolites and further affect the growth of fungal species (Gomes et al. 2018), or it could  
520 be due to the challenge from natural microbes (Yang et al. 2016), or both. The fungal  
521 genus *Alternaria* and *Fonsecaea* presented a remarkable shift in abundance in inoculated  
522 leaf tissues at 30 dpi compared to all other conditions, including infection at 10 dpi. Since  
523 our initial experimental design was not established to specifically survey the fungal  
524 community composition in apple leaves, our report is merely descriptive and correlative.  
525 We cannot determine whether the composition change observed at 30 dpi is due to the  
526 host reaction to rust infection, or directly from the fungus biotrophic growth through  
527 challenging host immunity and/or physiology, or both. However, the effect of rust infection  
528 at 30 dpi is consistent and supported by biological replicates and it represents an



529 interesting foundation for future studies to determine to which extent rust infection modifies  
530 the apple leaf fungal community. Many studies reported the effect of hyper-parasitic fungi  
531 on rust fungi (Kapooria and Sinha 1969; Koç and Défago 2008; Moricca et al. 2001;  
532 Tsuneda et al. 2011; Yuan et al. 1999), including one *Alternaria* species recently reported  
533 as hyper-parasites of *Puccinia striiformis* f. sp. *tritici* urediniospores (Zheng et al. 2017).  
534 The dominant position of *Alternaria* and *Fonsecaea* observed in *G. yamadae* infected  
535 leaves may imply the detection of novel *G. yamadae* hyperparasites, which may act as  
536 antagonists and represent interesting new leads for biological control of apple rust disease.

537

## 538 **Materials and Methods**

### 539 **Preparation of plant material and artificial inoculation**

540 Thirty *Malus domestica* cv 'fuji' seedlings (two-year-old, average 50 cm height) were  
541 bought from the Wanlü Nursery in Nanjing, Jiangsu, China. All these seedlings were  
542 planted in flower pots and placed in greenhouse under controlled temperature (26°C),  
543 relative humidity of 75% and with a 12h light/12h dark cycle for about one month. In early  
544 spring, *Juniperus chinensis* twigs with overwintering *G. yamadae* galls were collected in  
545 the field when mature telia extruded from the galls. The galls represent a natural inoculum,  
546 i.e. a mixture of *G. yamadae* isolates, and no other *Gymnosporangium* spp. can be  
547 confused with *G. yamadae* galls on *J. chinensis*. All these twigs were cleaned by a small  
548 brush to remove dust on the surface and placed in a container with sterile water overnight  
549 to ensure germination of telia. The germination efficiency was checked under the  
550 microscope (Leica-DM3000). Basidiospores were thoroughly mixed with sterile water and  
551 redistributed into separate sterile vials used for inoculation. Before the inoculation  
552 manipulation, all the seedlings were divided into two groups of fifteen seedlings kept under  
553 dark conditions for 12h overnight. One group was sprayed with the basidiospores solution  
554 on the top of the apple leaves and the other group was sprayed with sterile water as mock-  
555 inoculated control. After inoculation, all seedlings were covered with plastic transparent  
556 bags in order to ensure controlled infection. All bags had openings at the top to ensure air  
557 exchange. The seedlings were placed in a chamber with a temperature of 20°C and more  
558 than 95% relative humidity for two days to facilitate spore germination and penetration.  
559 Two days after inoculation, the temperature was adjusted back to room temperature (26°C)  
560 and to a relative humidity of 75%. At 10 dpi, globoid yellow spermogonia appeared on the  
561 upper surface of apple leaves. All plastic bags were then removed and the seedlings were  
562 placed outdoors for 20 more days in order to ensure proper aecia differentiation. At 30 dpi,  
563 long tubular aecia formed on the lower surface of apple leaves. At both time points, three  
564 independent replicates (different leaves from different seedlings) of approximately 50 mg  
565 diseased leaves and 50 mg control leaves were collected simultaneously. At 10 dpi,  
566 collected samples corresponded to infected leaves with bright-yellow spermogonia in the  
567 center (Figure 1). At 30 dpi, the collected samples consisted of leaf pieces with tubular  
568 aecia in the center and discoloured spots around the fungal sporulation structure. The  
569 samples were immediately frozen in liquid nitrogen and stored at -80°C until RNA isolation.

570

### 571 **RNA isolation, cDNA library preparation and RNA-sequencing**

572 Apple leaves were ground to fine powder by RNase free mortars and pestles with liquid  
573 nitrogen and the total RNA were isolated using the RNeasy Plant Mini Kit (Qiagen, Beijing,  
574 China) according to the manufacturer's instructions. For each sample, 3 µg RNA was used  
575 to generate sequencing library by using NEBNext® Ultra™ RNA Library Prep Kit for  
576 Illumina® (NEB, USA). PCR was carried out using Phusion High-Fidelity DNA polymerase,  
577 universal PCR primers and Index (X) Primer. PCR products were purified by AMPure XP  
578 system (Beckman Coulter, CA, USA) and the cDNA library quality was assessed on the  
579 Agilent Bioanalyzer 2100 system (Agilent Technologies, CA, USA). The cBot Cluster  
580 Generation System was used to cluster index-coded samples in libraries by TruSeq PE  
581 Cluster Kit v3-cBot-HS (Illumina, CA, USA). In each library, 150-bp paired-end reads were  
582 generated from Illumina HiSeq platform. cDNA and RNAseq library were performed at  
583 Novogene (Beijing, China), following standard Illumina's procedures. Raw reads in fastq  
584 format were firstly processed through in-house perl scripts to remove adapters, poly-N  
585 and low-quality reads. The remaining high-quality clean reads were used in the  
586 subsequent analysis. All raw sequence data generated in this study has been deposited  
587 in the NCBI Sequence Read Archive (<https://submit.ncbi.nlm.nih.gov/subs/sra/>) under the  
588 accession number SRR9326001-SRR9326012.

589

### 590 **Read mapping to the apple reference genome and gene expression analysis**

591 The reference genome and gene model annotation files of *Malus domestica* v1.0 were  
592 downloaded from Phytozome v.12 (<https://phytozome.jgi.doe.gov/pz/portal.html>). Bowtie  
593 v2.2.3 (Langmead et al. 2019) was used to build the index of the apple reference genome  
594 and paired-end clean reads were aligned to the reference genome using Tophat v2.0.12  
595 (Trapnell et al. 2009). The mapped reads were counted using HTSeq v0.6.1 (Anders et al.  
596 2015) and expected number of Fragments Per Kilobase of transcript sequence per Millions  
597 base pairs sequenced (FPKM) of each gene was calculated to estimate gene expression  
598 levels. Mapping and unigene expression estimates were performed by Novogene (Beijing,  
599 China). The similarity between samples at the expression levels was visualized using R  
600 package pheatmap (<https://CRAN.R-project.org/package=pheatmap>) by calculating the  
601 Pearson correlation coefficient between samples. To assess the variability among samples,  
602 principle component analysis (PCA) was performed from read counts via the plotPCA  
603 function in R package DESeq2 (Love et al. 2014). The comparisons between the  
604 transcripts lists from four condition were conducted via the interactive tool Venny  
605 (<http://bioinfogp.cnb.csic.es/tools/venny/index.html>). Differential expression analysis  
606 between inoculated groups and mock inoculated groups was performed by DESeq2 (Love  
607 et al. 2014) using a model based on the negative binomial distribution and the resulting *p*-  
608 values were adjusted using the Benjamini and Hochberg's approach for controlling the  
609 false discovery rate. Genes with an adjusted *p*-value lower than 0.05 were deemed as  
610 significantly differentially expressed.

611

## 612 **Functional analysis of differentially expressed genes**

613 All the significantly differentially expressed genes between inoculated and mock-  
614 inoculated conditions were classified into MapMan functional plant categories  
615 (denominated BINs) using the automated annotation pipeline Mercator 4 with default  
616 parameters (Schwache et al. 2019). Additionally, enrichment analysis of Kyoto  
617 Encyclopedia of Genes and Genomes (KEGG) pathways was performed by KOBAS  
618 version 2.0 (Mao et al. 2005) based on the hypergeometric test,  $p$ -values of KEGG  
619 pathways were corrected using Benjamini and Hochberg method. Pathways with adjusted  
620  $p$ -value < 0.05 were considered as significantly enriched.

621

## 622 **Transcriptome analysis, functional annotation, secretome prediction and sequence 623 analysis of *G. yamadae* spermogonia and aecia**

624 Reads unmapped to the apple reference genome in infected groups at 10d pi and 30 dpi  
625 were collectively subjected to *de novo* assembly using Trinity (Grabherr et al. 2011) with  
626 default parameters, which generated two transcriptomes at the two time points,  
627 respectively. FPKM expression levels for all unigenes were estimated in each replicate by  
628 RSEM (Li et al. 2015) and unigenes with FPKM > 0.3 in each library were retained for  
629 downstream analyses. All unigenes were compared to the genomes (blastn,  $e$ -value  $\leq 10^{-5}$ );  
630 predicted gene models (blastn,  $e$ -value  $\leq 10^{-5}$ ) and predicted proteins (blastx,  $e$ -value  
631  $\leq 10^{-5}$ ) of the four rust fungi *Puccinia graminis* f. sp. *tritici*, *P. striiformis* f. sp. *tritici*, *P. triticina*,  
632 *Melampsora larici-populina* and the genome of the basidiomycete *Laccaria bicolor*, whose  
633 genomes are available in the JGI Mycocosm (Grigoriev et al. 2013). In parallel, the  
634 unigenes were compared to 97,304 cleaned Pucciniales ESTs retrieved from dbEST at  
635 GenBank (blastn,  $e$ -value  $\leq 10^{-5}$ ). Unigenes showing homology in any of the searched  
636 databases were deemed as *G. yamadae* unigenes.

637 The fungal unigenes were annotated using public protein databases, including the  
638 National Center for Biotechnology Information (NCBI) non-redundant protein and  
639 nucleotide (NR, NT) databases, Swiss-Prot, Eukaryotic Orthologous Groups (KOG), Gene  
640 ontology (GO), protein families (PFAM), KEGG Orthology (KO) using Blastx ( $e$ -value  $\leq 10^{-5}$ ).  
641 The proteomes of *G. yamadae* spermogonia and aecia stages were predicted from the  
642 corresponding unigenes using TransDecoder v3.0.1. Assignment of unigenes to rust fungi,  
643 unigene expression estimates and annotations were performed by Novogene (Beijing,  
644 China). A secretome prediction pipeline with a combination of bioinformatic tools, including  
645 SignalP v.4, WolfPSort, TMHMM, TargetP and PS-Scan algorithms, was used to predict  
646 secreted proteins as described in Pellegrin et al. (2015). Candidate CAZymes, proteases  
647 and lipases were annotated in the predicted secretomes using dbCAN v2.0 HMM-based  
648 CAZy annotation server (Zhang et al. 2018), Merops (Rawlings et al. 2016) and the Lipase  
649 Engineering database (Fischer and Pleiss 2003), respectively. The three proteomes  
650 predicted from *G. yamadae* spermogonia and aecia from this study and from *G. yamadae*  
651 telia (Tao et al. 2017) were used for comparison by MCL analysis. Gene families were

652 clustered with fastOrtho MCL v12.135 (Wattam et al. 2014) using inflation parameters of  
653 3 and 50% identity and coverage. Spermogonia and aecia RTP homologs were retrieved  
654 from the annotation files and aligned with selected RTP homologs from rust fungi found in  
655 NCBI with the Omega cluster (<https://www.ebi.ac.uk/Tools/msa/clustalo/>) (Madeira et al.  
656 2019), and the UPGMA tree was done with MAFFT v6.864 ([https://www.genome.jp/tools-](https://www.genome.jp/tools-bin/mafft)  
657 [bin/mafft](https://www.genome.jp/tools-bin/mafft)).

658

### 659 **Identification of fungal community of the apple phyllosphere through a meta-** 660 **transcriptomic approach**

661 The meta-transcriptomic analysis was run separately to the transcriptome analysis using  
662 a dedicated approach and a distinct bioinformatic pipeline. First, all Illumina reads from  
663 the different replicate samples were trimmed and mapped onto the *M. domestica*  
664 reference genome using CLC Genomics Workbench 11.0 (QIAgen S.A.S. France,  
665 Courtaboeuf). A systematic trimming of 15 and 10 nucleotides at the 5' and 3' end,  
666 respectively, of all Illumina reads was applied, followed by mapping onto the apple genome  
667 (CLC "map reads to reference" procedure with default parameters except for length and  
668 similarity fractions set at 0.8). The final numbers of unmapped reads were in the same  
669 range than those of the transcriptome analysis. Paired-end reads unmapped onto the  
670 apple reference genome from all samples were used altogether to perform a *de novo* co-  
671 assembly using Megahit version 1.1.3 with default parameters (Li et al. 2015), and contigs  
672 smaller than 500bp were discarded. Reads of each sample were then mapped on the  
673 selected contigs using bowtie version 2.3.0 (Langmead and Salzberg 2012). Counts were  
674 determined using SAMtools version 1.7 (Li et al. 2009). Contigs supported by less than 3  
675 samples and less than 5 counts were discarded. The remaining contigs were annotated  
676 using a blast-like procedure using DIAMOND version 0.9.19 (Buchfink et al. 2015) with  
677 the parameters --more sensitive --max-target-seqs 1 --max-hsps 1 --evaluate 0.00001 and  
678 JGI-Mycocosm (<https://genome.jgi.doe.gov/mycocosm/home>) predicted proteins from  
679 fungal genomes (deposited before July 2018) as a reference database. Diamond  
680 annotation was doubled using NCBI-NR (March 2018 version) to check for fungal false  
681 positives, based on the comparison between Mycocosm and NR best bit scores. Count  
682 tables and annotations for phyllosphere fungal composition were then analyzed at various  
683 taxonomical levels using R version 3.4.3 and packages dplyR and ggplot2. Taxonomical  
684 category "others" corresponds to taxa with a relative abundance below  $10^{-3}$  in all samples.

685

### 686 **Acknowledgements**

687 This work was financed by the National Natural Science Foundation of China (No.  
688 31870628). The authors acknowledge the financial support from China Scholarship  
689 Council (No. 201806510009) for the Joint PhD Program between Beijing Forestry  
690 University and INRA-Nancy. SD is supported by the French 'Investissements d'Avenir'  
691 program (ANR-11-LABX-0002-01, Lab of Excellence ARBRE). Y. M. Liang and S.  
692 Duplessis designed this research. S. Q. Tao performed the experiments. L. Auer and E.

693 Morin performed the bioinformatic analysis. S. Duplessis and S. Q. Tao analysed data  
694 and wrote the manuscript. All authors approved the final manuscript for submission.

695

## 696 Literature Cited

- 697 Aime, M. C., MacTaggart, A. R., Mondo, S. J., and Duplessis, S. 2017. Phylogenetics and  
698 phylogenomics of rust fungi. *Adv. Genet.* 100: 267-307.
- 699 Agler, M. T., Ruhe, J., Kroll, S., Morhenn, C., Kim, S.T., Weigel, D., and Kemen, E. M. 2016.  
700 Microbial hub taxa link host and abiotic factors to plant microbiome variation. *PLoS Biology.*  
701 14:1002352.
- 702 Ahuja, I., Kissen, R., and Bones, A. M. 2012. Phytoalexins in defense against pathogens. *Trends*  
703 *in Plant Science.* 17:73–90.
- 704 Anders, S., Pyl, P. T., and Huber, W. 2015. HTSeq—a Python framework to work with high-  
705 throughput sequencing data. *Bioinformatics.* 31:166–169.
- 706 Arnold, A. E., Maynard, Z., Gilbert, G. S., Coley, P. D., and Kursar, T. A. 2002. Are tropical fungal  
707 endophytes hyperdiverse. *Ecology Letters.* 3:267–274.
- 708 Azaiez, A., Boyle, B., Levée, V., and Séguin, A. 2009. Transcriptome profiling in hybrid poplar  
709 following interactions with *Melampsora* rust fungi. *Mol. Plant-Microbe Interact.* 22:190–200.
- 710 Becker, R., Behrendt, U., Hommel, B., Kropf, S., and Ulrich, A. 2008. Effects of transgenic fructan-  
711 producing potatoes on the community structure of rhizosphere and phyllosphere bacteria. *FEMS*  
712 *Microbiology Ecology.* 66:411-425.
- 713 Buchfink, B., Xie, C., and Huson, D. H. 2015. Fast and sensitive protein alignment using DIAMOND.  
714 *Nat Methods.* 12:59-60.
- 715 Burton, R. A., Gidley, M. J., and Fincher, G. B. 2010. Heterogeneity in the chemistry, structure and  
716 function of plant cell walls. *Nat. Chem. Biol.* 6:724–732.
- 717 Busby, P. E., Peay, K. G., and Newcombe, G. 2016. Common foliar fungi of *Populus trichocarpa*  
718 modify *Melampsora* rust disease severity. *New Phytologist.* 209:1681–1692.
- 719 Camatti-Sartori, V., da Silva-Ribeiro, R. T., Valdebenito-Sanhueza, R. M., Pagnocca, F. C.,  
720 Echeverrigaray, S., and Azevedo, J. L. 2005. Endophytic yeasts and filamentous fungi associated  
721 with southern Brazilian apple (*Malus domestica*) orchards subjected to conventional, integrated  
722 or organic cultivation. *Journal of Basic Microbiology.* 45:397–402.
- 723 Chen, X. Y., and Kim, J. Y. 2014. Callose synthesis in higher plants. *Plant Signaling & Behavior.*  
724 4:489–492.
- 725 Cummins, G., and Hiratsuka, Y. 2003. Illustrated genera of rust fungi. Pages: 1-225. in: *Illustrated*  
726 *Genera of Rust Fungi.* APS Press, St Paul, MN, U.S.A.
- 727 Cuomo, C.A., Bakkeren, G., Khalil, H. B., Panwar, V., Joly, D., Linning, R., Sakthikumar, S., Song,  
728 X., Adiconis, X., Fan, L., Goldberg, J. M., Levin, J. Z., Young, S., Zeng, Q., Anikster, Y., Bruce, M.,  
729 Wang, M., Yin, C., McCallum, B., Szabo, L. J., Hulbert, S., Chen, X., and Fellers, J. P. 2017.  
730 Comparative analysis highlights variable genome content of wheat rusts and divergence of the  
731 mating loci. *G3 (Bethesda).* 7:361-376.



- 732 Dobon, A., Bunting, D. C. E., Cabrera-Quio, L. E., Uauy, C., and Saunders, D. G. O. 2016. The  
733 host-pathogen interaction between wheat and yellow rust induces temporally coordinated waves  
734 of gene expression. *BMC Genomics*. 17(1):380.
- 735 Duplessis, S., Major, I., Martin, F., and Séguin, A. 2009. Poplar and pathogen interactions: insights  
736 from genome-wide analyses of resistance and defense gene families and expression profiling of  
737 poplar leaves upon infection with rust. *Critical Reviews in Plant Science*. 28:309-334.
- 738 Duplessis, S., Bakkeren, G., and Hamelin, R. 2014. Advancing knowledge on biology of rust fungi  
739 through genomics. *Advances in Botanical Research*. 70:173-209.
- 740 Fernandez, D., Tisserant, E., Talhinhos, P., Azinheira, H., Vieira, A., Petitot, A. S., Loureiro, A.,  
741 Poulain, J., Da Silva, C., Silva Mdo, C., and Duplessis, S. 2012. 454-pyrosequencing of *Coffea*  
742 *arabica* leaves infected by the rust fungus *Hemileia vastatrix* reveals in planta-expressed  
743 pathogen-secreted proteins and plant functions in a late compatible plant-rust interaction.  
744 *Molecular Plant Pathology*. 13:17-37.
- 745 Fischer, M., and Pleiss, J. 2003. The Lipase Engineering Database: a navigation and analysis tool  
746 for protein families. *Nucleic Acids Res*. 31:319-321.
- 747 Gomes, T., Pereira, J. A., Benhadi, J., Lino-Neto, T., and Baptista, P. 2018. Endophytic and  
748 epiphytic phyllosphere fungal communities are shaped by different environmental factors in a  
749 mediterranean ecosystem. *Microb Ecol*. 76:668-679.
- 750 Grabherr, M. G., Haas, B. J., Yassour, M., Levin, J. Z., Thompson, D. A., Amit, I., Adiconis, X., Fan,  
751 L., Raychowdhury, R., Zeng, Q., Chen, Z., Mauceli, E., Hacohen, N., Gnirke, A., Rhind, N., di  
752 Palma, F., Birren, B. W., Nusbaum, C., Lindblad-Toh, K., Friedman, N., and Regev, A. 2011. Full-  
753 length transcriptome assembly from RNA-Seq data without a reference genome. *Nat Biotechnol*.  
754 29:644-52.
- 755 Grigoriev, I. V., Nikitin, R., Haridas, S., Kuo, A., Ohm, R., Otilar, R., Riley, R., Salamov, A., Zhao,  
756 X., Korzeniewski, F., Smirnova, T., Nordberg, H., Dubchak, I., and Shabalov, I. 2013. MycoCosm  
757 portal: gearing up for 1000 fungal genomes. *Nucleic Acids Res*. 42:699–704.
- 758 Gullner, G., Komives, T., Király, L., and Schröder, P. 2018. Glutathione S-Transferase Enzymes in  
759 Plant-Pathogen Interactions. *Front Plant Sci*. 9:1836.
- 760 Guo, Y. N. 1994. The integrated management of the rust of apple (*Gymnosporangium yamadae*  
761 Miyabe). *Bull. Agric. Sci. Technol*. 19:28–29. (In Chinese).
- 762 Harada, Y. 1984. Pear and apple rusts in Japan, with special reference to their life cycles and host  
763 ranges. Tottori Mycological Institute: Tottori Prefecture. Report.
- 764 Hassani, M. A., Durán, P., and Hacquard, S. 2018. Microbial interactions within the plant holobiont.  
765 *Microbiome*. 6:58.
- 766 Josè-Estanyol, M. and Puigdomènech, P. 2000. Plant cell wall glycoproteins and their genes. *Plant*  
767 *Physiol. Biochem*. 38:97–108.
- 768 Kapooria, R. G., and Sinha, S. 1969. Phylloplane mycoflora of pearl millet and its influence on the  
769 development of *Puccinia penniseti*. *Trans. Br. Mycol. Soc*. 53:153–155.
- 770 Kawahara, Y., Oono, Y., Kanamori, H., Matsumoto, T., Itoh, T., and Minami, E. 2012. Simultaneous  
771 RNA-seq analysis of a mixed transcriptome of rice and blast fungus interaction. *PLoS One*.  
772 7:49423.

- 773 Kemen, A. C., Agler, M. T., and Kemen, E. 2015. Host-microbe and microbe-microbe interactions  
774 in the evolution of obligate plant parasitism. *New Phytologist*. 206:1207–1228.
- 775 Kemen, E., Kemen, A. C., Rafiqi, M., Hempel, U., Mendgen, K., Hahn, M., and Voegelé, R.T. 2005.  
776 Identification of a protein from rust fungi transferred from haustoria into infected plant cells. *Mol*  
777 *Plant Microbe Interact.* 18:1130-9.
- 778 Kern, F. D. A revised taxonomic account of *Gymnosporangium*. 1973. Pennsylvania State  
779 University Press, University Park, U.S.A.
- 780 Kim, S. C., and Kim, C. H. 1980. Studies on the disease of pear rust caused by *Gymnosporangium*  
781 *haraeanum* Sydow. I: Some ecological investigation of inoculum source. *Korean Journal of Plant*  
782 *Pathology*. 19:39-44.
- 783 Koç, N. K., and Défago, G. 2008. Studies on the host range of the hyperparasite *Aphanocladium*  
784 *album*. *J. Phytopathol.* 107:214–218.
- 785 Laforest Lapointe, I., and Whitaker, B. K. 2019. Decrypting the phyllosphere microbiota: progress  
786 and challenges. *American Journal of Botany*. 64:3256–3.
- 787 Lallement, P. A., Brouwer, B., Keech, O., Hecker, A., and Rouhier, N. 2014. The still mysterious  
788 roles of cysteine-containing glutathione transferases in plants. *Front. Pharmacol.* 5:192.
- 789 Langmead, B., and Salzberg, S. L. 2012. Fast gapped-read alignment with Bowtie 2. *Nat Methods*.  
790 9:357-9.
- 791 Langmead, B., Wilks, C., Antonescu, V., and Charles, R. 2019. Scaling read aligners to hundreds  
792 of threads on general-purpose processors. *Bioinformatics*. 35:421-432.
- 793 Leveau, J. H. J and Tech, J. J. 2011. Grapevine microbiomics: bacterial diversity on grape leaves  
794 and berries revealed by high-throughput sequence analysis of 16S rRNA amplicons. *Acta*  
795 *Horticulturae*. 905:31–42.
- 796 Li, D., Liu, C.-M., Luo, R., Sadakane, K., and Lam, T. W. 2015. MEGAHIT: an ultra-fast single-node  
797 solution for large and complex metagenomics assembly via succinct de Bruijn graph.  
798 *Bioinformatics*. 31:1674-6.
- 799 Li, H., Handsaker, B., Wysoker, A., Fennell, T., Ruan, J., Homer, N., Marth, G., Abecasis, G., and  
800 Durbin, R. 2009. The Sequence Alignment/Map format and SAMtools. *Bioinformatics*. 25:2078-9.
- 801 Li, P., Piao, Y., Shon, H. S., and Ryu, K. H. 2015. Comparing the normalization methods for the  
802 differential analysis of Illumina high-throughput RNA-Seq data. *BMC Bioinformatics*. 16:347.
- 803 Lindow, S. E., and Brandl, M. T. 2003. Microbiology of the Phyllosphere. *Applied and Environmental*  
804 *Microbiology*. 69: 1875–1883.
- 805 Liu, J.-J., Sturrock, R. N., Sniezko, R. A., Williams, H., Benton, R., and Zamany, A. 2015.  
806 Transcriptome analysis of the white pine blister rust pathogen *Cronartium ribicola*: de novo  
807 assembly, expression profiling, and identification of candidate effectors. *BMC Genomics*. 16:678.
- 808 Lorrain, C., Gonçalves dos Santos, K. C., Germain, H., Hecker, A., and Duplessis, S. 2019.  
809 Advances in understanding obligate biotrophy in rust fungi. *New Phytologist*. 222:1190–1206.
- 810 Lorrain, C., Marchal, C., Hacquard, S., Delaruelle, C., Pétrowski, J., Petre, B., Hecker, A., Frey, P.,  
811 and Duplessis, S. 2018. The rust fungus *Melampsora larici-populina* expresses a conserved  
812 genetic program and distinct sets of secreted protein genes during infection of its two host plants,  
813 larch and poplar. *Mol Plant Microbe Interact.* 31:695-706.

- 814 Love, M. I., Huber, W., and Anders, S. 2014. Moderated estimation of fold change and dispersion  
815 for RNA-seq data with DESeq2. *Genome Biology*. 15:550.
- 816 Lu, Y., Chen, Q., Bu, Y., Luo, R., Hao, S., Zhang, J., Tian, J., and Yao, Y. 2017. Flavonoid  
817 accumulation plays an important role in the rust resistance of *Malus* plant leaves. *Frontiers in*  
818 *Plant Science*. 8:237–13.
- 819 Madeira, F., Park, Y. M., Lee, J., Buso, N., Gur, T., Madhusoodanan, N., Basutkar, P., Tivey, A. R.  
820 N., Potter, S. C., Finn, R. D., and Lopez, R. 2019. The EMBL-EBI search and sequence analysis  
821 tools APIs in 2019. *Nucleic Acids Research*. 47: 636-641.
- 822 Mao, X., Cai, T., Olyarchuk, J. G., and Wei, L. 2005. Automated genome annotation and pathway  
823 identification using the KEGG Orthology (KO) as a controlled vocabulary. *Bioinformatics*. 21:3787-  
824 93.
- 825 Miranda, M., Ralph, S. G., Mellway, R., White, R., Heath, M. C., Bohlmann, J., and Constabel, C.  
826 P. 2007. The transcriptional response of hybrid poplar (*Populus trichocarpa* x *P. deltoides*) to  
827 infection by *Melampsora medusae* leaf rust involves induction of flavonoid pathway genes leading  
828 to the accumulation of proanthocyanidins. *Mol. Plant-Microbe Interact*. 20: 816–831.
- 829 Moricca, S., Ragazzi, A., Mitchelson, K. R., and Assante, G. 2001. Antagonism of the two-needle  
830 pine stem rust fungi *Cronartium flaccidum* and *Peridermium pini* by *Cladosporium tenuissimum*  
831 in vitro and in planta. *Phytopathology*. 91:457–468.
- 832 Pégeot, H., Koh, C. S., Petre, B., Mathiot, S., Duplessis, S., Hecker, A., Didierjean, C., and Rouhier,  
833 N. 2014. The poplar Phi class glutathione transferase: expression, activity and structure of GSTF1.  
834 *Frontiers in Plant Science*. 5:712.
- 835 Pellegrin, C., Morin, E., Martin, F. M., and Veneault-Fourrey, C. 2015. Comparative analysis of  
836 secretomes from ectomycorrhizal fungi with an emphasis on small-secreted proteins. *Frontiers in*  
837 *Microbiology*. 6:1278.
- 838 Peterson, R. S. Studies of juniper rusts. 1967. *Madroño*. 19:79-91.
- 839 Pretsch, K., Kemen, A., Kemen, E., Geiger, M., Mendgen, K., and Voegelé, R. 2013. The rust  
840 transferred proteins—a new family of effector proteins exhibiting protease inhibitor function. *Mol*  
841 *Plant Pathol*. 14:96-107.
- 842 Puthoff, D. P., Neelam, A., Ehrenfried, M. L., Scheffler, B. E., Ballard, L., Song, Q., Campbell, K. B.,  
843 Cooper, B., and Tucker, M. L. 2008. Analysis of expressed sequence tags from *Uromyces*  
844 *appendiculatus* hyphae and haustoria and their comparison to sequences from other rust fungi.  
845 *Phytopathology*. 98:1126-35.
- 846 Rawlings, N. D., Barrett, A. J., and Finn, R. 2016. Twenty years of the Merops database of  
847 proteolytic enzymes, their substrates and inhibitors. *Nucleic Acids Res*. 44:343–350.
- 848 Reisberg, E. E., Hildebrandt, U., Riederer, M., and Hentschel, U. 2012. Phyllosphere bacterial  
849 communities of trichome-bearing and trichomeless *Arabidopsis thaliana* leaves. *Antonie Van*  
850 *Leeuwenhoek*. 101:551–560.
- 851 Rinaldi, C., Kohler, A., Frey, P., Duchaussoy, F., Ningre, N., Couloux, A., Wincker, P., Le Thiec, D.,  
852 Fluch, S., Martin, F., and Duplessis, S. 2007. Transcript profiling of poplar leaves upon infection  
853 with compatible and incompatible strains of the foliar rust *Melampsora larici-populina*. *Plant*  
854 *Physiology*. 144: 347–366.

- 855 Ritpitakphong, U., Falquet, L., Vimoltust, A., Berger, A., Métraux, J.-P., and L'Haridon, F. 2016. The  
856 microbiome of the leaf surface of *Arabidopsis* protects against a fungal pathogen. *New Phytologist*.  
857 210:1033–1043.
- 858 Schneider, K. T., Mortel, M. V. D., Bancroft, T. J., Braun, E., Nettleton, D., Nelson, R. T., Frederick,  
859 R. D., Baum, T. J., Graham, M. A., and Whitham, S. A. 2011. Biphasic gene expression changes  
860 elicited by *Phakopsora pachyrhizi* in soybean correlate with fungal penetration and haustoria  
861 formation. *Plant Physiology*. 157:355-371.
- 862 Schwacke, R., Ponce-Soto, G. Y., Krause, K., Bolger, A. M., Arsova, B., Hallab, A., Gruden, K., Stitt,  
863 M., Bolger, M.E., and Usadel, B. 2019. MapMan4: A refined protein classification and annotation  
864 framework applicable to multi-omics data analysis. *Mol Plant*. 12:879-892.
- 865 Sperschneider, J., Dodds, P. N, Taylor, J. M., and Duplessis, S. 2017. Computational Methods for  
866 Predicting Effectors in Rust Pathogens. *Methods Mol Biol*. 1659:73-83.
- 867 Stone, B. A., and Clarke, A. E. 1992. *Chemistry and Biology of (1-3)-β-D-Glucans*. La Trobe  
868 University Press, Victoria, Australia.
- 869 Struck, C. 2015. Amino acid uptake in rust fungi. *Frontiers in Plant Science*. 6:40.
- 870 Tao, S.-Q., Cao, B., Tian, C.-M., and Liang, Y.-M. 2017. Comparative transcriptome analysis and  
871 identification of candidate effectors in two related rust species (*Gymnosporangium yamadae* and  
872 *Gymnosporangium asiaticum*). *BMC Genomics*. 18:651.
- 873 Tao, S.-Q., Cao, B., Tian, C.-M., Liang, Y.-M. 2018. Development and characterization of novel  
874 genic-SSR markers in apple-Juniper rust pathogen *Gymnosporangium yamadae* (Pucciniales:  
875 Pucciniaceae) using next-generation sequencing. *International Journal of Molecular Sciences*.  
876 19:1178.
- 877 Tavares, S., Ramos, A. P., Pires, A. S., Azinheira, H. G., Caldeirinha, P., Link, T., Abranches, R.,  
878 Silva Mdo, C., Voegelé, R. T., Loureiro, J., and Talhinhos, P. 2014. Genome size analyses of  
879 Pucciniales reveal the largest fungal genomes. *Front Plant Sci*. 5:422.
- 880 Teixeira, P. J. P. L., Thomazella, D. P. T., Reis, O., do Prado, P. F. V., do Rio, M. C. S., Fiorin, G. L.,  
881 José, J., Costa, G. G. L., Negri, V. A., Mondego, J. M. C., Mieczkowski, P., Pereira, G. A. G. 2014.  
882 High-Resolution Transcript Profiling of the Atypical Biotrophic Interaction between *Theobroma*  
883 *cacao* and the Fungal Pathogen *Monilophthora perniciosa*. *Plant Cell*. 26:4245-4269.
- 884 Trapnell, C., Pachter, L., and Salzberg, S. L. 2009. TopHat: discovering splice junctions with RNA-  
885 Seq. *Bioinformatics*. 25:1105-11.
- 886 Treutter, D. 2006. Significance of flavonoids in plant resistance: a review. *Environ. Chem. Lett*.  
887 4:147–157.
- 888 Tsuneda, A., Hiratsuka, Y., and Maruyama, P. J. 2011. Hyperparasitism of *Scytalidium uredinicola*  
889 on western gall rust, *Endocronartium harknessii*. *Can. J. Bot*. 58:1154–1159.
- 890 Ullah, C., Tsai, C. J., Unsicker, S. B., Xue, L.-J., Reichelt, M., Gershenson, J. and Hammerbacher,  
891 A. 2019. Salicylic acid activates poplar defense against the biotrophic rust fungus *Melampsora*  
892 *larici-populina* via increased biosynthesis of catechin and proanthocyanidins. *New Phytologists*.  
893 221:960-975.

- 894 Ullah, C., Unsicker, S. B., Fellenberg, C., Constabel, C. P., Schmidt, A., Gershenzon, J., and  
895 Hammerbacher, A. 2017. Flavan-3-ols are an effective chemical defense against rust infection.  
896 *Plant Physiology*. 175:1560–1578.
- 897 van de Mortel, M., Recknor, J. C., Graham, M. A., Nettleton, D., Dittman, J. D., Nelson, R. T., Godoy,  
898 C. V., Abdelnoor, R. V., Almeida, A. M., Baum, T. J., and Whitham, S. A. 2007. Distinct biphasic  
899 mRNA changes in response to Asian soybean rust infection. *Molecular Plant-Microbe Interactions*.  
900 20:887-899.
- 901 Velasco, R., Zharkikh, A., Affourtit, J., Dhingra, A., Cestaro, A., Kalyanaraman, A., Fontana, P.,  
902 Bhatnagar, S. K., Troggio, M., Pruss, D., Salvi, S., Pindo, M., Baldi, P., Castelletti, S., Cavaiuolo,  
903 M., Coppola, G., Costa, F., Cova, V., Dal Ri, A., Goremykin, V., Komjanc, M., Longhi, S., Magnago,  
904 P., Malacarne, G., Malnoy, M., Micheletti, D., Moretto, M., Perazzolli, M., Si-Ammour, A., Vezzulli,  
905 S., Zini, E., Eldredge, G., Fitzgerald, L. M., Gutin, N., Lanchbury, J., Macalma, T., Mitchell, J. T.,  
906 Reid, J., Wardell, B., Kodira, C., Chen, Z., Desany, B., Niazi, F., Palmer, M., Koepke, T., Jiwan,  
907 D., Schaeffer, S., Krishnan, V., Wu, C., Chu, V.-T., King, S. T., Vick, J., Tao, Q., Mraz, A., Stormo,  
908 A., Stormo, K., Bogden, R., Ederle, D., Stella, A., Vecchietti, A., Kater, M. M., Masiero, S.,  
909 Lasserre, P., Lespinasse, Y., Allan, A. C., Bus, V., Chagné, D., Crowhurst, R. N., Gleave, A. P.,  
910 Lavezzo, E., Fawcett, J. A., Proost, S., Rouzé, P., Sterck, L., Toppo, S., Lazzari, B., Hellens, R.  
911 P., Durel, C. E., Gutin, A., Bumgarner, R. E., Gardiner, S. E., Skolnick, M., Egholm, M., Van de  
912 Peer, Y., Salamini, F., and Viola, R. 2010. The genome of the domesticated apple (*Malus*  
913 *domestica* Borkh.). *Nature genetics*. 42:833-9
- 914 Voegelé, R.T., Hahn, M., and Mendgen, K. 2009. The Uredinales: cytology, biochemistry, and  
915 molecular biology. In: HB Deising, eds. *Plant relationships. The Mycota (A comprehensive treatise*  
916 *on fungi as experimental systems for basic and applied research)*. Berlin, Germany: Springer. 69–  
917 98.
- 918 Vogel, C., Bodenhausen, N., Gruissem, W., and Vorholt, J. A. 2016. The *Arabidopsis* leaf  
919 transcriptome reveals distinct but also overlapping responses to colonization by phyllosphere  
920 commensals and pathogen infection with impact on plant health. *New Phytologist*. 212:192–207.
- 921 Vorholt, J. A. 2012. Microbial life in the phyllosphere. *Nature Publishing Group*. 10:828–840.
- 922 Wang, Q. Zhang, X., Li, F., Hou, Y., Liu, X., and Zhang, X. 2011. Identification of a UDP-glucose  
923 pyrophosphorylase from cotton (*Gossypium hirsutum* L.) involved in cellulose biosynthesis in  
924 *Arabidopsis thaliana*. *Plant Cell Reports*. 30:1303–1312.
- 925 Wang, S.-Q., Yang, Z.-P., and Yu, J. 2010. The reasons that apple rust happens seriously and  
926 comprehensive prevention and control measures. *China Gard*. 26:145–146. (In Chinese).
- 927 Wattam, A. R., Abraham, D., Dalay, O., Disz, T. L., Driscoll, T., Grabbard, J. L., Gillespie, J. J.,  
928 Gough, R., Hix, D., Kenyon, R., Machi, D., Mao, C., Nordberg, E. K., Olson, R., Overbeek, R.,  
929 Pusch, G. D., Shukla, M., Schulman, J., Stevens, R. L., Sullivan, D. E., Vonstein, V., Warren, A.,  
930 Will, R., Wilson, M. J., Yoo, H. S., Zhang, C., Zhang, Y., and Sobral, B. W. 2014. PATRIC, the  
931 bacterial bioinformatics database and analysis resource. *Nucl Acids Res*. 42: 581-591.
- 932 Westermann, A. J., Barquist, L., and Vogel, J. 2017. Resolving host-pathogen interactions by dual  
933 RNA-seq. *PLoS pathogens*. 13:1006033.
- 934 Wolf, S., Hematy, K. and Hofte, H. 2012. Growth control and cell wall signaling in plants. *Annu. Rev.*



- 935 Plant Biol. 63:381–407.
- 936 Xu, J., Li, M., Jiao, P., Tao, H., Wei, N., Ma, F., and Zhang, J. 2015. Dynamic transcription profiles  
937 of “Qinguan” apple (*Malus × domestica*) leaves in response to *Marssonina coronaria* inoculation.  
938 Frontiers in Plant Science. 6:25–11.
- 939 Yang, T., Sun, H.-B., Shen, C.-C., and Chu, H.-Y. 2016. Fungal assemblages in different habitats  
940 in an Erman's birch forest. Frontiers in Microbiology. 7:1368.
- 941 Yuan, Z. M., Hunter, T., Ruiz, C., and Royle, D. J. 1999. Pathogenicity to willow rust, *melampsora*  
942 *epitea*, of the mycoparasite *sphaerellopsis filum* from different sources. Mycol. Res. 103:509–512.
- 943 Yun, H. Y., Lee, S. K., and Lee, K. J. 2005. Identification of aecial host ranges of four Korean  
944 *Gymnosporangium* species based on the artificial inoculation with teliospores obtained from  
945 various forms of telia. Plant Pathology Journal. 21:310-316.
- 946 Zhang, H., Yohe, T., Huang, L., Entwistle, S., Wu, P., Yang, Z., Busk, P. K., Xu, Y., and Yin, Y. 2018.  
947 dbCAN2: a meta server for automated carbohydrate-active enzyme annotation. Nucleic Acids  
948 Res. 46:95-101.
- 949 Zheng, L., Zhao, J., Liang, X., Zhan, G., Jiang, S., and Kang, Z. 2017. Identification of a novel  
950 *Alternaria alternata* strain able to hyperparasitize *Puccinia striiformis* f. sp. *tritici*, the causal agent  
951 of wheat stripe rust. Frontiers in Microbiology. 8:71.
- 952

953 **Tables**

954

955 **Table 1.** Sequencing and mapping information of RNA-seq data from 12 libraries of apple leaves.

| Sample                   | Library                    | Clean reads | Reads mapped to <i>Malus domestica</i> | Rust unigenes <sup>a</sup> |
|--------------------------|----------------------------|-------------|----------------------------------------|----------------------------|
| Inoculated (10 dpi)      | Inoculated (10 dpi)_1      | 100,206,930 | 61,059,189 (60.9%)                     | 30,293                     |
|                          | Inoculated (10 dpi)_2      | 77,191,936  | 49,422,953 (64.0%)                     |                            |
|                          | Inoculated (10 dpi)_3      | 87,378,970  | 56,459,826 (64.6%)                     |                            |
|                          | total                      | 264,777,836 | 166,941,968 (63.2%)                    |                            |
| Mock-inoculated (10 dpi) | Mock-inoculated (10 dpi)_1 | 65,394,614  | 51,116,139 (78.2%)                     | -                          |
|                          | Mock-inoculated (10 dpi)_2 | 66,237,512  | 51,749,324 (78.1%)                     |                            |
|                          | Mock-inoculated (10 dpi)_3 | 62,536,254  | 49,104,270 (78.5%)                     |                            |
|                          | total                      | 194,186,380 | 151,969,733 (78.3%)                    |                            |
| Inoculated (30 dpi)      | Inoculated (30 dpi)_1      | 87,373,062  | 22,244,421 (25.5%)                     | 22,717                     |
|                          | Inoculated (30 dpi)_2      | 97,680,330  | 19,448,833 (19.9%)                     |                            |
|                          | Inoculated (30 dpi)_3      | 84,796,366  | 24,319,732 (28.7%)                     |                            |
|                          | total                      | 269,849,758 | 66,012,986 (24.7%)                     |                            |
| Mock-inoculated (30 dpi) | Mock-inoculated (30 dpi)_1 | 41,186,566  | 33,721,232 (81.9%)                     | -                          |
|                          | Mock-inoculated (30 dpi)_2 | 51,906,804  | 42,616,916 (82.1%)                     |                            |
|                          | Mock-inoculated (30 dpi)_3 | 58,183,906  | 47,693,953 (81.9%)                     |                            |
|                          | total                      | 151,277,276 | 124,032,101 (82.0%)                    |                            |

956 <sup>a</sup> Un-mapped reads from inoculated apple leaves at 10dpi and 30dpi were assembled and  
 957 compared to Basidiomycota genomic data and Pucciniales ESTs to determine rust unigenes for  
 958 spermogonia and aecia, respectively

959

960 **Table 2.** Top significantly differentially expressed apple genes (DEGs) in leaves infected by the  
 961 rust fungus *Gymnosporangium yamadae* at 10 and 30 days post inoculation (dpi). Only DEGs  
 962 showing a readcount over 100 in one of the conditions (inoculated or mock-inoculated) were  
 963 considered at each time point.  
 964

| Gene_id       | Readcount Inoculated | Readcount Mock-inoculated | log <sub>2</sub> (fold-change) | P-value   | Gene description                                                                 |
|---------------|----------------------|---------------------------|--------------------------------|-----------|----------------------------------------------------------------------------------|
| <b>10 dpi</b> |                      |                           |                                |           |                                                                                  |
| 103443849     | 6675.97              | 21.44                     | 8.29                           | 3.70E-148 | Short-chain type dehydrogenase/reductase-like                                    |
| 103415907     | 1303.09              | 3.42                      | 8.58                           | 3.53E-108 | Reticuline oxidase-like protein                                                  |
| 103400169     | 692.51               | 2.81                      | 7.95                           | 7.39E-54  | Patatin-like protein                                                             |
| 103439643     | 660.84               | 1.4                       | 8.89                           | 2.38E-03  | No hit found                                                                     |
| 103413950     | 618.35               | 0                         | > 9.28                         | 3.39E-10  | Beta-glucosidase                                                                 |
| 103408464     | 582.8                | 0.85                      | 9.44                           | 4.21E-15  | Flavanone 7-O-glucoside 2"-O-beta-L-rhamnosyltransferase-like                    |
| 103426327     | 452.31               | 0.85                      | 9.07                           | 4.27E-74  | 1-aminocyclopropane-1-carboxylate synthase-like                                  |
| 103440114     | 349.25               | 0.87                      | 8.66                           | 1.54E-63  | Sorbitol dehydrogenase-like                                                      |
| 103429696     | 334.68               | 0.57                      | 9.21                           | 7.93E-12  | Putative 12-oxophytodienoate reductase                                           |
| 103423646     | 318.52               | 0.29                      | 10.15                          | 2.25E-09  | Beta-glucosidase                                                                 |
| 103404862     | 280.77               | 1.14                      | 7.96                           | 4.40E-16  | Formin-like protein                                                              |
| 103436320     | 251.41               | 0                         | > 7.98                         | 3.73E-03  | Beta-glucosidase                                                                 |
| 103421201     | 245.17               | 0.86                      | 8.16                           | 8.61E-51  | Patatin-like protein                                                             |
| 103425667     | 220.69               | 0.57                      | 8.62                           | 6.93E-28  | Uncharacterized locus                                                            |
| 103447903     | 211.32               | 0.86                      | 7.96                           | 5.16E-30  | Bifunctional monodehydroascorbate reductase and carbonic anhydrase nectarin-like |
| 103420873     | 194.51               | 0.59                      | 8.39                           | 1.07E-17  | Probable LRR receptor-like serine/threonine-protein kinase                       |
| 103423647     | 189.96               | 0                         | > 7.57                         | 1.09E-02  | Cyanogenic beta-glucosidase-like                                                 |
| 103401439     | 141.45               | 0.29                      | 8.98                           | 2.50E-07  | Uncharacterized locus                                                            |

|               |         |         |         |          |                                               |
|---------------|---------|---------|---------|----------|-----------------------------------------------|
| 103413952     | 116.62  | 0       | > 6.87  | 1.85E-07 | Uncharacterized locus                         |
| 103404861     | 110.04  | 0.28    | 8.64    | 4.08E-30 | Vegetative cell wall protein gp1-like         |
| 103449066     | 2.29    | 112.76  | -5.63   | 5.85E-03 | Transcription initiation factor TFIID subunit |
| 103440578     | 2.46    | 117.2   | -5.58   | 5.21E-03 | Aspartic Protease in Guard Cell-like protein  |
| 103403477     | 2.78    | 144.21  | -5.7    | 4.65E-10 | Serine/threonine-protein kinase BRI1-like     |
| 103440896     | 0.39    | 235.97  | -9.26   | 2.41E-11 | Thermospermine synthase Acaulis-like          |
| 103455791     | 2.91    | 292     | -6.66   | 2.02E-06 | Thermospermine synthase Acaulis-like          |
| 103437991     | 2.51    | 327.42  | -7.03   | 7.56E-12 | Zinc finger protein Constans-like             |
| 103451980     | 5.91    | 422.22  | -6.17   | 3.42E-05 | Galactinol synthase-like                      |
| 103451601     | 1.4     | 634.37  | -8.84   | 1.92E-07 | Beta-amyrin 28-oxidase-like                   |
| 103424346     | 22.24   | 2625.42 | -6.89   | 1.77E-04 | Uncharacterized locus                         |
| <b>30 dpi</b> |         |         |         |          |                                               |
| 103451807     | 4251.52 | 0.34    | 13.64   | 1.72E-41 | Expansin-A10                                  |
| 103452933     | 2805.97 | 1.36    | 11.02   | 1.16E-35 | SRG1-like protein                             |
| 103433546     | 2182.84 | 5.02    | 8.77    | 7.86E-06 | laccase-like                                  |
| 103425476     | 2098.2  | 0.54    | 11.94   | 8.04E-36 | Expansin-A1-like                              |
| 103433527     | 1359.8  | 0.95    | 10.49   | 4.09E-32 | Non-specific lipid-transfer protein           |
| 103438035     | 1276.53 | 0.28    | 12.17   | 3.03E-33 | Expansin-A8-like                              |
| 103411433     | 1080.33 | 0       | > 10.08 | 8.71E-20 | Uncharacterized locus                         |
| 103456171     | 970.52  | 1.32    | 9.53    | 1.05E-05 | Uncharacterized locus<br>Carotenoid cleavage  |
| 103441305     | 904.03  | 0       | > 9.83  | 8.59E-14 | dioxygenase 8 homolog B. chloroplastic        |
| 103443282     | 835.31  | 1.71    | 8.94    | 5.04E-27 | 36.4 kDa proline-rich protein-like            |
| 103441585     | 702.17  | 1.4     | 8.98    | 2.32E-26 | extensin                                      |
| 103443566     | 686.29  | 0.8     | 9.75    | 1.78E-27 | Anthranilate N-benzoyltransferase protein     |
| 103404862     | 681.53  | 0.56    | 10.27   | 3.60E-28 | Formin-like protein                           |
| 103452268     | 531.22  | 0       | > 9.06  | 5.88E-20 | early nodulin-93-like                         |
| 103402951     | 517.95  | 0.8     | 9.35    | 1.21E-25 | Transcription factor bHLH79-like              |

|           |        |      |        |          |                                                            |
|-----------|--------|------|--------|----------|------------------------------------------------------------|
| 103455522 | 505.15 | 0.62 | 9.69   | 5.15E-26 | Anthocyanidin 3-O-glucosyltransferase-like                 |
| 103419762 | 505.14 | 0    | > 8.99 | 3.64E-28 | Uncharacterized locus                                      |
| 103400077 | 477.78 | 0    | > 8.91 | 4.05E-09 | 36.4 kDa proline-rich protein-like                         |
| 103417079 | 476.51 | 0.88 | 9.1    | 6.98E-08 | Collectin-like                                             |
| 103438562 | 425.63 | 0    | > 8.74 | 4.15E-27 | NRT1/ PTR family protein                                   |
| 103421504 | 388.31 | 0.56 | 9.46   | 2.77E-13 | Uncharacterized locus                                      |
| 103404890 | 286.73 | 0    | > 8.17 | 4.62E-24 | LOB domain-containing protein                              |
| 103402332 | 286.66 | 0    | > 8.17 | 3.70E-10 | Basic blue protein-like                                    |
| 103446347 | 283.53 | 0.26 | 10.1   | 7.64E-23 | Uncharacterized locus                                      |
| 103429659 | 280.15 | 0    | > 8.14 | 1.05E-07 | SRG1-like protein                                          |
| 103448995 | 275.5  | 0    | > 8.11 | 4.08E-10 | Ent-copalyl diphosphate synthase. chloroplastic            |
| 103408191 | 269.95 | 0    | > 8.08 | 8.44E-24 | acyl-[acyl-carrier-protein] desaturase. chloroplastic-like |
| 103455514 | 241.42 | 0.26 | 9.86   | 1.27E-06 | Non-specific lipid-transfer protein 2-like                 |
| 103402593 | 235.55 | 0.28 | 9.73   | 1.95E-07 | No hit found                                               |
| 103400926 | 232.04 | 0.28 | 9.71   | 3.78E-14 | Dehydration-responsive protein RD22-like                   |
| 103418672 | 211.69 | 0    | > 7.73 | 1.14E-18 | DNA-damage-repair/toleration protein DRT100-like           |
| 103404861 | 194.73 | 0    | > 7.61 | 1.86E-21 | Vegetative cell wall protein gp1-like                      |
| 103443280 | 187.64 | 0    | > 7.56 | 3.44E-21 | Early nodulin-like                                         |
| 103453404 | 178.6  | 0    | > 7.49 | 1.83E-04 | Protease inhibitor-like                                    |
| 103400792 | 172.57 | 0    | > 7.44 | 8.40E-20 | 1-aminocyclopropane-1-carboxylate oxidase 1                |
| 103423101 | 170.34 | 0    | > 7.42 | 5.54E-06 | Sulfate transporter 3.1-like                               |
| 103441202 | 166.87 | 0    | > 7.39 | 2.42E-20 | expansin-B3-like                                           |
| 103450960 | 163.92 | 0    | > 7.36 | 3.52E-20 | Transcription factor bHLH94-like                           |
| 103438017 | 161.77 | 0    | > 7.34 | 4.26E-20 | Expansin-A8-like                                           |
| 103415187 | 151.87 | 0    | > 7.25 | 1.14E-19 | Pectate lyase                                              |
| 103436684 | 148.38 | 0    | > 7.22 | 1.20E-19 | Putative DNA-binding protein Escarola                      |



|           |        |          |         |          |                                                                 |
|-----------|--------|----------|---------|----------|-----------------------------------------------------------------|
| 103415461 | 139.08 | 0        | > 7.12  | 5.42E-10 | Carotenoid cleavage dioxygenase 8 homolog B. chloroplastic-like |
| 103402577 | 124.98 | 0        | > 6.97  | 1.67E-14 | MLP-like protein 329                                            |
| 103413366 | 118.38 | 0.28     | 8.74    | 6.80E-17 | Time For Coffee-like protein                                    |
| 103432922 | 117.63 | 0        | > 6.88  | 5.53E-18 | Expansin-A8                                                     |
| 103453609 | 108.21 | 0        | > 6.76  | 2.72E-17 | AP2-like ethylene-responsive transcription factor BBM           |
| 103453438 | 0      | 114.9    | < -6.76 | 8.73E-06 | Ethylene-responsive transcription factor ERF109-like            |
| 103426648 | 0.36   | 122.03   | -8.44   | 1.01E-05 | Ethylene-responsive transcription factor TINY-like              |
| 103413400 | 1.25   | 141.53   | -6.84   | 8.69E-06 | Indole-3-acetic acid-induced protein ARG2-like                  |
| 103451896 | 0.71   | 190.98   | -8.09   | 2.02E-05 | Glycerol-3-phosphate 2-O-acyltransferase-like                   |
| 103433370 | 2.3    | 207.08   | -6.5    | 8.38E-04 | Zinc finger protein ZAT11-like                                  |
| 103434640 | 3.96   | 299.22   | -6.25   | 1.53E-05 | (3S.6E)-nerolidol synthase 1-like                               |
| 103425818 | 6.71   | 482.06   | -6.17   | 1.66E-17 | Carbonic anhydrase. chloroplastic-like                          |
| 103443332 | 7.25   | 502.77   | -6.12   | 8.04E-04 | 23 kDa jasmonate-induced protein-like                           |
| 103421612 | 2.46   | 659.1    | -8.07   | 3.28E-23 | Carbonic anhydrase. chloroplastic-like                          |
| 103435858 | 11.57  | 981.63   | -6.41   | 2.38E-03 | Uncharacterized locus                                           |
| 103453940 | 2.75   | 1183.48  | -8.76   | 3.23E-03 | Dehydration-responsive element-binding protein-like             |
| 103421479 | 5.02   | 2682.39  | -9.07   | 6.29E-30 | Carbonic anhydrase-like                                         |
| 103453624 | 29.41  | 3036     | -6.69   | 3.72E-05 | Methanol O-anthraniloyltransferase-like                         |
| 103407412 | 12.06  | 4074.08  | -8.41   | 7.74E-04 | Cytosolic sulfotransferase-like                                 |
| 103400423 | 26.2   | 5974.65  | -7.84   | 3.85E-05 | Dehydrodolichyl diphosphate synthase-like                       |
| 103439257 | 40.36  | 6793.83  | -7.4    | 5.14E-05 | Uncharacterized locus                                           |
| 103440452 | 333.71 | 27405.51 | -6.36   | 6.20E-04 | Uncharacterized locus                                           |

966 **Table 3.** Most highly expressed *G. yamadae* unigenes (FPKM > 10<sup>3</sup>) in infected apple leaves at  
 967 10 days post inoculation (spermogonia) and 30 days post inoculation (aecia).  
 968

| Gene_id            | Gene length | FPKM     | SP <sup>a</sup> | Nr description <sup>b</sup>                    | Best blast hit (species) <sup>b</sup>                          | Accession no. <sup>b</sup> |
|--------------------|-------------|----------|-----------------|------------------------------------------------|----------------------------------------------------------------|----------------------------|
| <b>Spermogonia</b> |             |          |                 |                                                |                                                                |                            |
| Cluster-3395.52629 | 950         | 20408.36 | yes             | hypothetical protein                           | <i>Schizophyllum commune</i> H4-8                              | SCHCODR AFT_17653          |
| Cluster-3395.52347 | 543         | 13219.69 | no              | -                                              | -                                                              | -                          |
| Cluster-3395.53063 | 1628        | 6900.57  | no              | pheromone precursor                            | <i>Melampsora larici-populina</i> 98AG31                       | MELLADR AFT_124593         |
| Cluster-3395.53628 | 768         | 5172.74  | no              | glutathione transferase omega-1                | <i>Pyrenophora tritici-repentis</i> Pt-1C-BFP                  | PTRG_06303                 |
| Cluster-3395.53292 | 667         | 4195.46  | no              | thioredoxin                                    | <i>Lichtheimia corymbifera</i> JMRC:FSU:9682                   | LCOR_10494.1               |
| Cluster-3395.52692 | 1320        | 3962.04  | no              | hypothetical protein                           | <i>Melampsora larici-populina</i> 98AG31                       | MELLADR AFT_90288          |
| Cluster-3395.52264 | 2139        | 3931.11  | yes             | hypothetical protein                           | <i>Puccinia graminis</i> f. sp. <i>tritici</i> CRL 75-36-700-3 | PGTG_16232                 |
| Cluster-3395.53264 | 493         | 3145.31  | no              | -                                              | -                                                              | -                          |
| Cluster-3395.53104 | 1367        | 3014.95  | no              | -                                              | -                                                              | -                          |
| Cluster-3395.52880 | 2175        | 2403.82  | no              | hypothetical protein                           | <i>Rhizophagus irregularis</i> DAOM 181602                     | GLOINDRA FT_336076         |
| Cluster-3395.50468 | 346         | 2387.85  | no              | polyubiquitin-A                                | <i>Puccinia graminis</i> f. sp. <i>tritici</i> CRL 75-36-700-3 | PGTG_13068                 |
| Cluster-3395.53066 | 1876        | 1962.48  | no              | carbohydrate -binding module family 20 protein | <i>Baudoinia compniacensis</i> UAMH 10762                      | BAUCODR AFT_75770          |
| Cluster-3395.52404 | 929         | 1898.96  | no              | glutathione peroxidase                         | <i>Candida tenuis</i> ATCC 10573                               | CANTEDR AFT_99227          |

|                    |      |         |     |                                                       |                                                                |                    |
|--------------------|------|---------|-----|-------------------------------------------------------|----------------------------------------------------------------|--------------------|
| Cluster-3395.51614 | 987  | 1867.29 | no  | hypothetical protein                                  | <i>Rhizophagus irregularis</i> DAOM 181602                     | GLOINDRA FT_254986 |
| Cluster-3395.50509 | 1007 | 1860.47 | yes | hypothetical protein                                  | <i>Puccinia graminis</i> f. sp. <i>tritici</i> CRL 75-36-700-3 | PGTG_19614         |
| Cluster-3395.54678 | 289  | 1740.58 | no  | polyubiquitin-A                                       | <i>Puccinia graminis</i> f. sp. <i>tritici</i> CRL 75-36-700-3 | PGTG_13068         |
| Cluster-3395.54279 | 620  | 1438.94 | no  | hypothetical protein                                  | <i>Setosphaeria turcica</i> Et28A                              | SETTUDR AFT_172987 |
| Cluster-3395.52185 | 1115 | 1277.40 | yes | secreted protein                                      | <i>Melampsora larici-populina</i> 98AG31                       | MELLADR AFT_77195  |
| Cluster-3395.47475 | 277  | 1127.98 | no  | polyubiquitin-A                                       | <i>Puccinia graminis</i> f. sp. <i>tritici</i> CRL 75-36-700-3 | PGTG_13068         |
| Cluster-3395.52238 | 2102 | 1115.53 | no  | hypothetical protein                                  | <i>Parasitella parasitica</i>                                  | PARPA_04782.1      |
| Cluster-3395.47751 | 800  | 1069.38 | no  | calmodulin                                            | <i>Batrachochytrium dendrobatidis</i> JAM81                    | BATDEDR AFT_19649  |
| Cluster-3395.54738 | 2488 | 1068.63 | yes | hypothetical protein                                  | <i>Rhizophagus irregularis</i> DAOM 181602                     | GLOINDRA FT_64662  |
| Cluster-3395.52566 | 2594 | 1066.09 | no  | hypothetical protein                                  | <i>Puccinia graminis</i> f. sp. <i>tritici</i> CRL 75-36-700-3 | PGTG_05495         |
| Cluster-3395.52492 | 2983 | 1052.32 | no  | hypothetical protein                                  | <i>Puccinia graminis</i> f. sp. <i>tritici</i> CRL 75-36-700-3 | PGTG_01215         |
| Cluster-3395.52660 | 1225 | 1004.77 | no  | NADP-dependent leukotriene B4 12-hydroxydehydrogenase | <i>Schizosaccharomyces japonicus</i> yFS275                    | SJAG_02151         |
| Cluster-3395.54718 | 1202 | 1004.76 | no  | -                                                     | -                                                              | -                  |

---

**Aecia**

---

|                     |      |          |     |                                   |                                                                |                   |
|---------------------|------|----------|-----|-----------------------------------|----------------------------------------------------------------|-------------------|
| Cluster-17511.37981 | 655  | 18240.45 | no  | hypothetical protein              | <i>Fonsecaea pedrosoi</i> CBS 271.37                           | Z517_08130        |
| Cluster-17511.38200 | 976  | 8017.83  | no  | hypothetical protein              | <i>Puccinia graminis</i> f. sp. <i>tritici</i> CRL 75-36-700-3 | PGTG_11079        |
| Cluster-17511.38317 | 1697 | 7078.13  | yes | differentiation-related protein 1 | <i>Puccinia striiformis</i> f. sp. <i>tritici</i>              | JF316700.1        |
| Cluster-17511.38243 | 2111 | 4051.81  | yes | hypothetical protein              | <i>Puccinia graminis</i> f. sp. <i>tritici</i> CRL 75-36-700-3 | PGTG_00898        |
| Cluster-17511.38208 | 1511 | 3695.60  | yes | secreted protein                  | <i>Melampsora larici-populina</i> 98AG31                       | Mellp1_114961     |
| Cluster-17511.39220 | 1132 | 3510.75  | no  | secreted protein                  | <i>Melampsora larici-populina</i> 98AG31                       | Mellp1_55804      |
| Cluster-17511.38422 | 990  | 2900.82  | no  | hypothetical protein              | <i>Melampsora larici-populina</i> 98AG31                       | MELLADR AFT_72416 |
| Cluster-17511.38041 | 1074 | 2371.33  | no  | hypothetical protein              | <i>Puccinia graminis</i> f. sp. <i>tritici</i> CRL 75-36-700-3 | PGTG_09216        |
| Cluster-17511.38141 | 1351 | 2116.35  | no  | hypothetical protein              | <i>Galerina marginata</i> CBS 339.88                           | GALMADR AFT_24757 |
| Cluster-17511.38023 | 1412 | 2015.93  | no  | hypothetical protein              | <i>Puccinia graminis</i> f. sp. <i>tritici</i> CRL 75-36-700-3 | PGTG_19835        |
| Cluster-17511.37610 | 1676 | 1939.43  | no  | thiazole biosynthetic enzyme      | <i>Puccinia graminis</i> f. sp. <i>tritici</i> CRL 75-36-700-3 | PGTG_01304        |
| Cluster-17511.37739 | 919  | 1688.17  | no  | hypothetical protein              | <i>Puccinia graminis</i> f. sp. <i>tritici</i> CRL 75-36-700-3 | PGTG_00252        |
| Cluster-17511.38462 | 1046 | 1669.41  | yes | secreted protein                  | <i>Melampsora larici-populina</i> 98AG31                       | MELLADR AFT_55804 |
| Cluster-17511.37999 | 861  | 1557.56  | no  | hypothetical protein              | <i>Melampsora larici-populina</i> 98AG31                       | MELLADR AFT_88098 |
| Cluster-17511.37820 | 2317 | 1319.15  | no  | hypothetical protein              | <i>Puccinia graminis</i> f. sp. <i>tritici</i> CRL 75-36-700-3 | PGTG_07544        |

|                     |      |         |    |                           |                                                                |              |
|---------------------|------|---------|----|---------------------------|----------------------------------------------------------------|--------------|
| Cluster-17511.37994 | 1454 | 1264.76 | no | hypothetical protein      | <i>Puccinia graminis</i> f. sp. <i>tritici</i> CRL 75-36-700-3 | PGTG_14957   |
| Cluster-17511.37571 | 710  | 1240.60 | no | hypothetical protein      | <i>Puccinia graminis</i> f. sp. <i>tritici</i> CRL 75-36-700-3 | PGTG_10504   |
| Cluster-17511.37319 | 1914 | 1233.49 | no | hypothetical protein      | <i>Puccinia graminis</i> f. sp. <i>tritici</i> CRL 75-36-700-3 | PGTG_07040   |
| Cluster-17511.38094 | 2157 | 1097.85 | no | -                         | -                                                              | -            |
| Cluster-17511.38624 | 2556 | 1072.20 | no | elongation factor 1-alpha | <i>Puccinia graminis</i> f. sp. <i>tritici</i> CRL 75-36-700-3 | PGTG_14858   |
| Cluster-17511.37763 | 877  | 1052.67 | no | -                         | -                                                              | -            |
| Cluster-17511.38481 | 1675 | 1051.81 | no | hypothetical protein      | <i>Absidia idahoensis</i> var. <i>thermophila</i>              | LRAMOSA04894 |
| Cluster-17511.37654 | 1754 | 1012.13 | no | hypothetical protein      | <i>Puccinia graminis</i> f. sp. <i>tritici</i> CRL 75-36-700-3 | PGTG_06229   |

969 <sup>a</sup> Secretion prediction using a dedicated pipeline in this study. <sup>b</sup> Blastx searches against the  
970 National Center for Biotechnology Information (NCBI) non-redundant protein (Nr) database.  
971



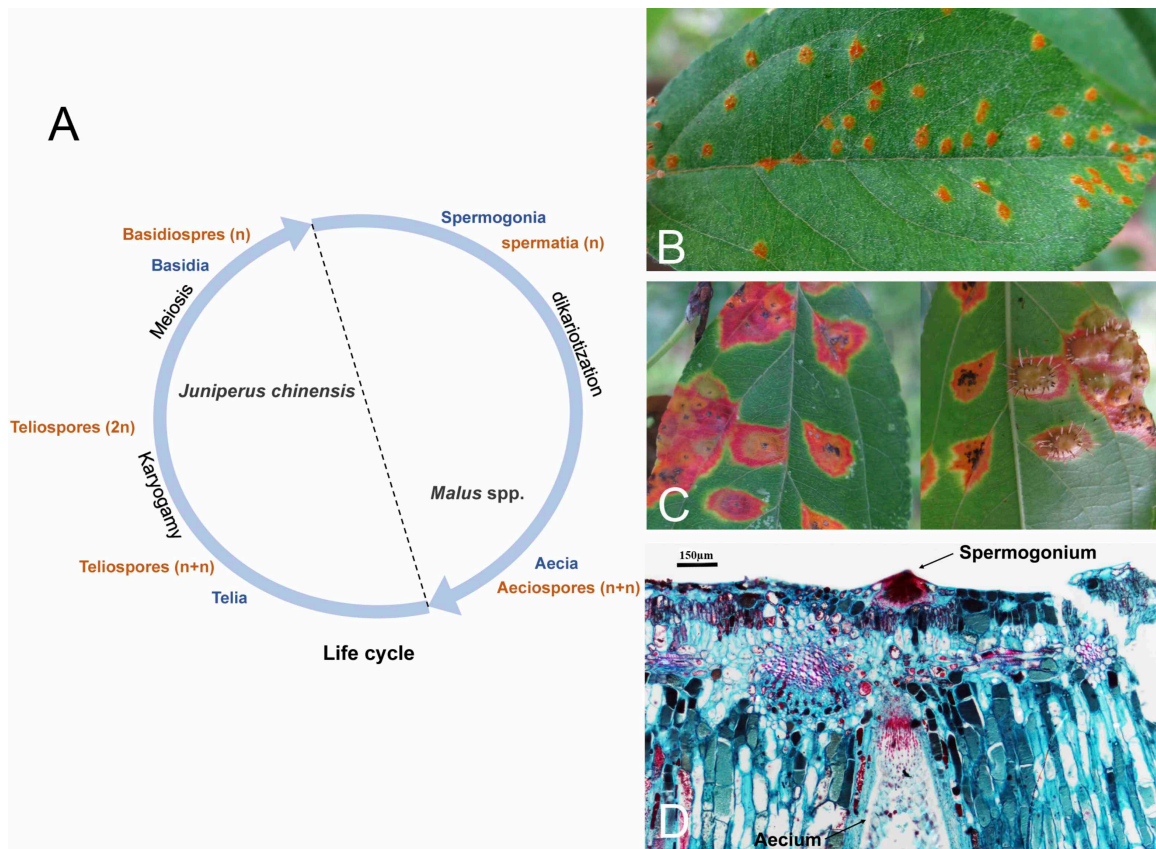

972

973

974 **Figure 1.** Spermogonia and aecia stages in the *Gymnosporangium yamadae* life cycle. A:  
975 schematic view of *G. yamadae* life cycle illustrating the spore stages used for inoculation (here  
976 teliospores and basidiospores from *Juniperus chinensis* as primary inoculum) and for samples  
977 collection (spermogonia and aecia on *Malus domestica*). B: Spermogonia visible on the upper  
978 surface of apple leaves 10 days after controlled inoculation. C: upper (left) and lower (right)  
979 sides of the same apple leaf are shown with coloured area around the sporulation zones and tubular  
980 aecia extruding on the lower side of the leaf 30 days after inoculation. D: longitudinal section of a  
981 *G. yamadae* infected apple leaf stained with aniline blue and phenol red, showing a tubular aecium  
982 in red formed on the lower leaf epidermis, directly below a globoid spermogonium also in red, shown  
983 on the upper epidermis.

984

985

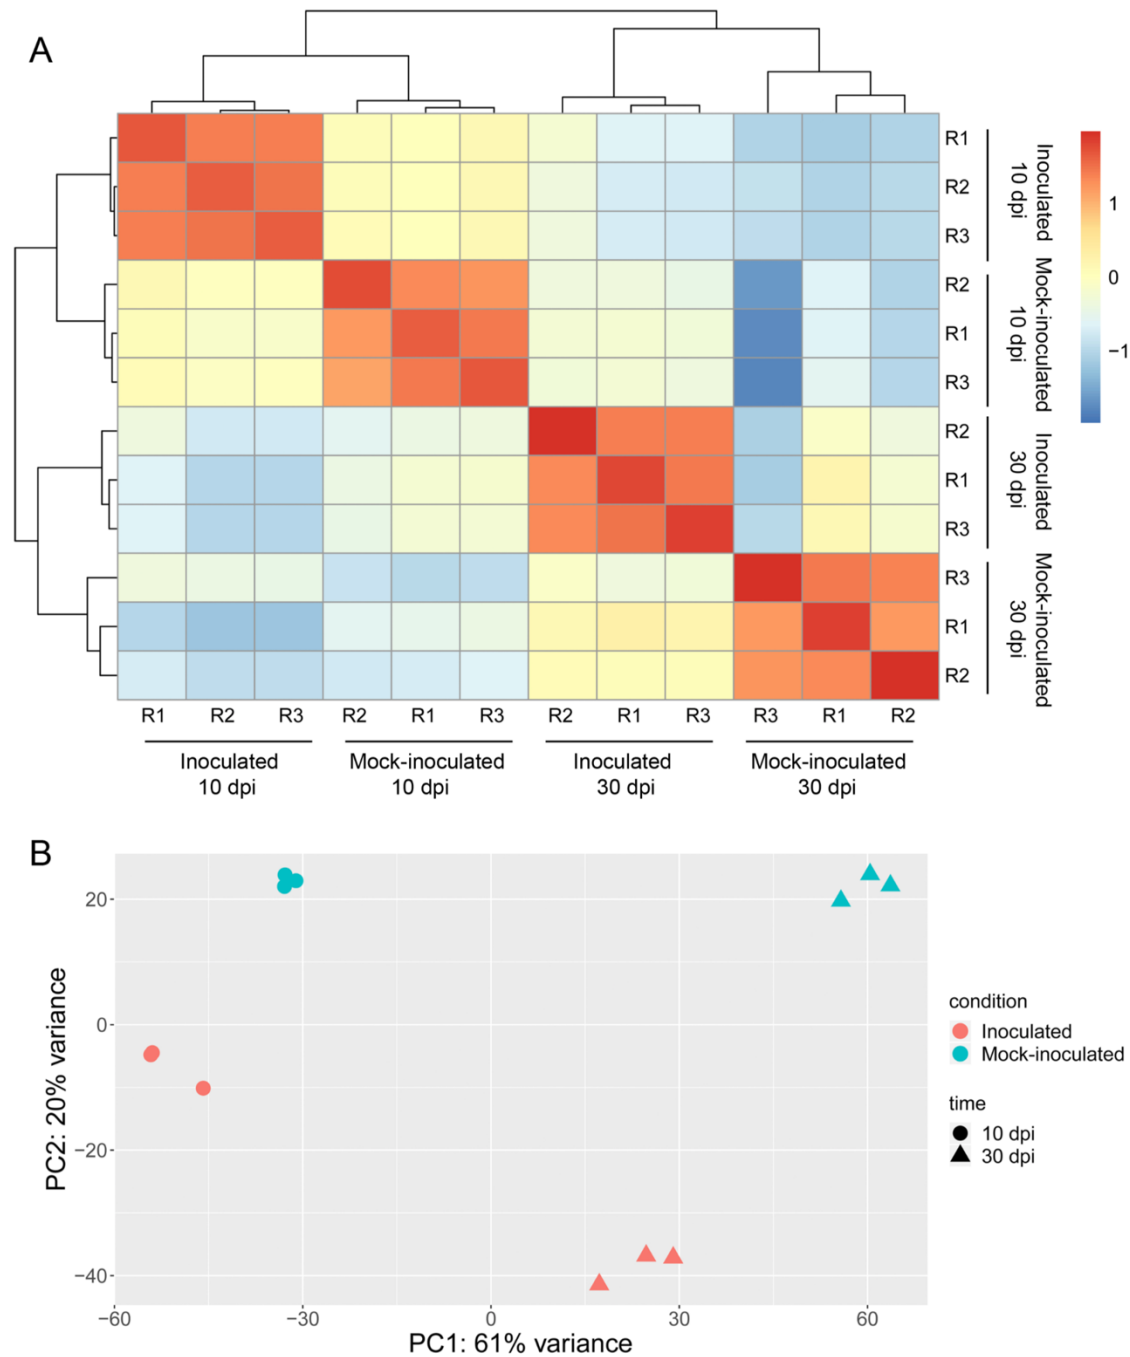

986

987

988

989

990

991

992

**Figure 2.** Assessment of RNA-seq data reproducibility. A: Hierarchical clustering of replicates of the inoculated and mock-inoculated conditions at the two time points, 10 and 30 days post-inoculation (dpi), based on Pearson correlation coefficients between samples. B: Principal component analysis (PCA) of read counts of inoculated and mock-inoculated conditions at the time points 10 and 30 dpi, showing the clear separation of the four tested conditions and the proximity of biological replicates. The two principal components explain 81% of the total variance.

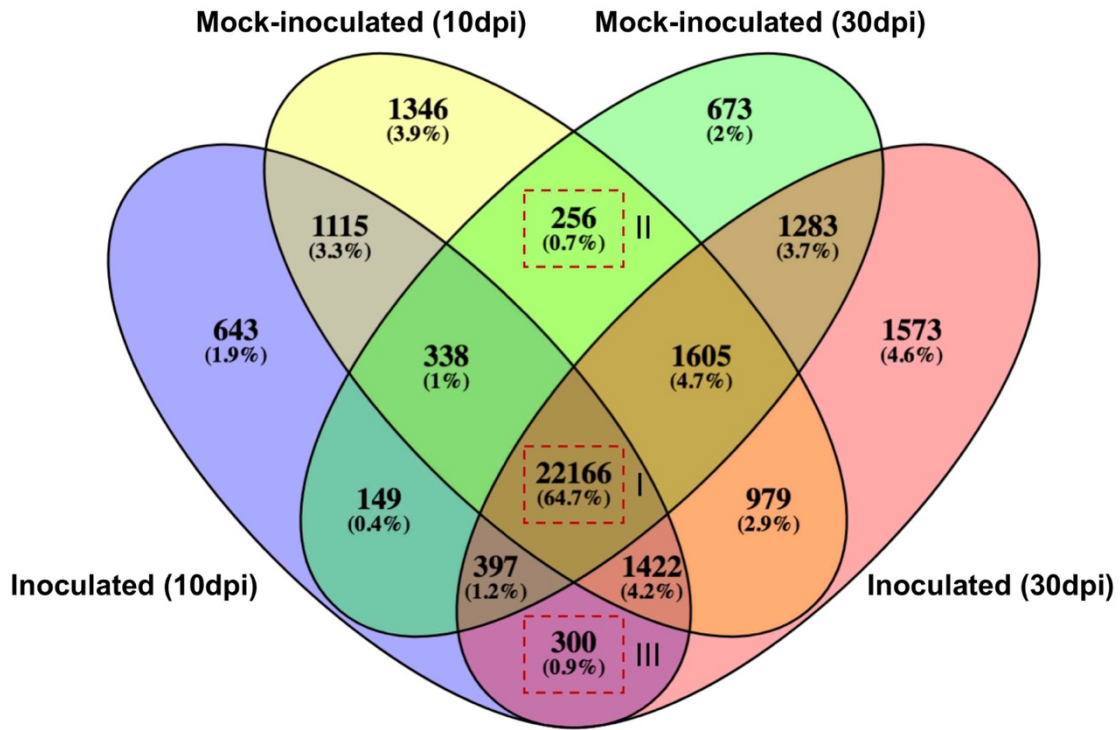

993

994

995

**Figure 3.** Venn diagram showing the number of genes expressed in each condition. Group I indicating the genes detected in all conditions; group II refers to genes specifically found in the inoculated groups at the two time points, 10 and 30 days post-inoculation (dpi); group III refers to genes exclusively expressed in the mock inoculated groups at two time points.

998

999

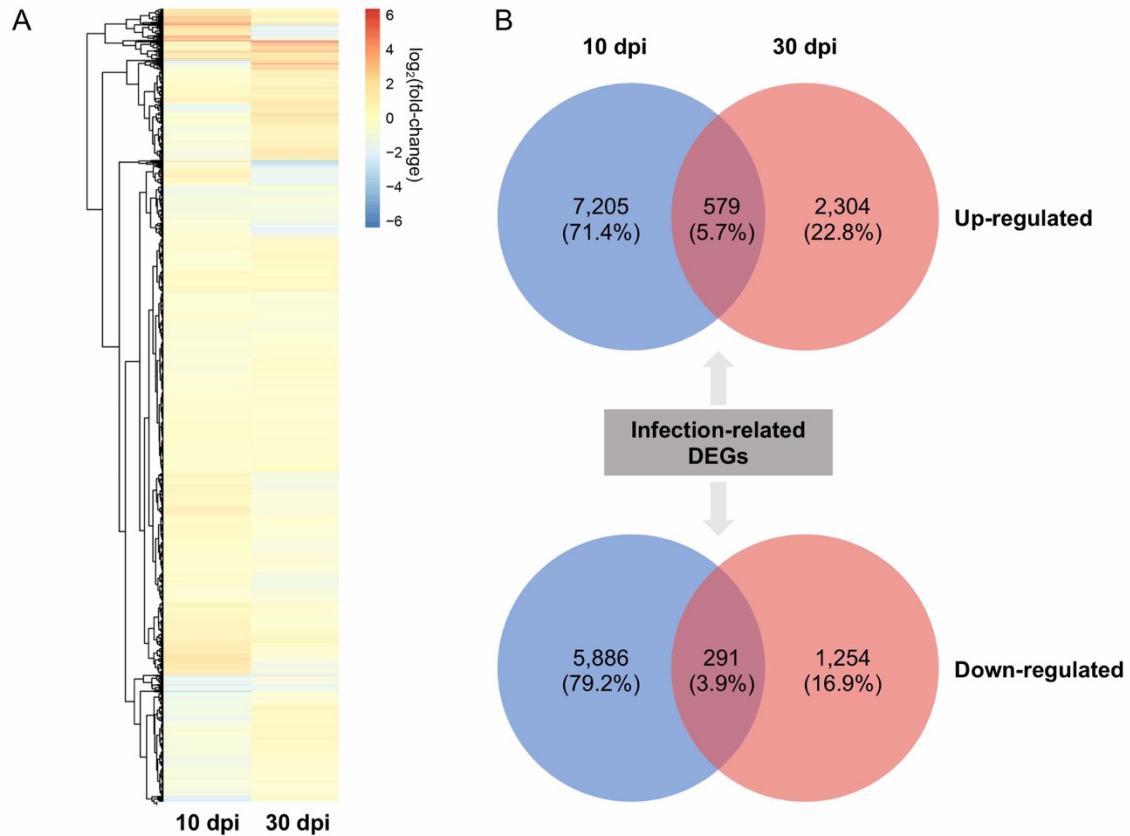

1000  
1001  
1002  
1003  
1004  
1005  
1006  
1007

**Figure 4.** Differentially expressed genes (DEGs) between inoculated and mock inoculated apple leaves at 10 and 30 days post-inoculation (dpi). A: Hierarchical clustering analysis of the DEGs at 10 dpi and 30 dpi. B: The upper and lower Venn diagrams showing all the up-regulated and down-regulated genes at 10 dpi and 30 dpi, and the arrows pointing to the number of genes differentially expressed at the both time points.

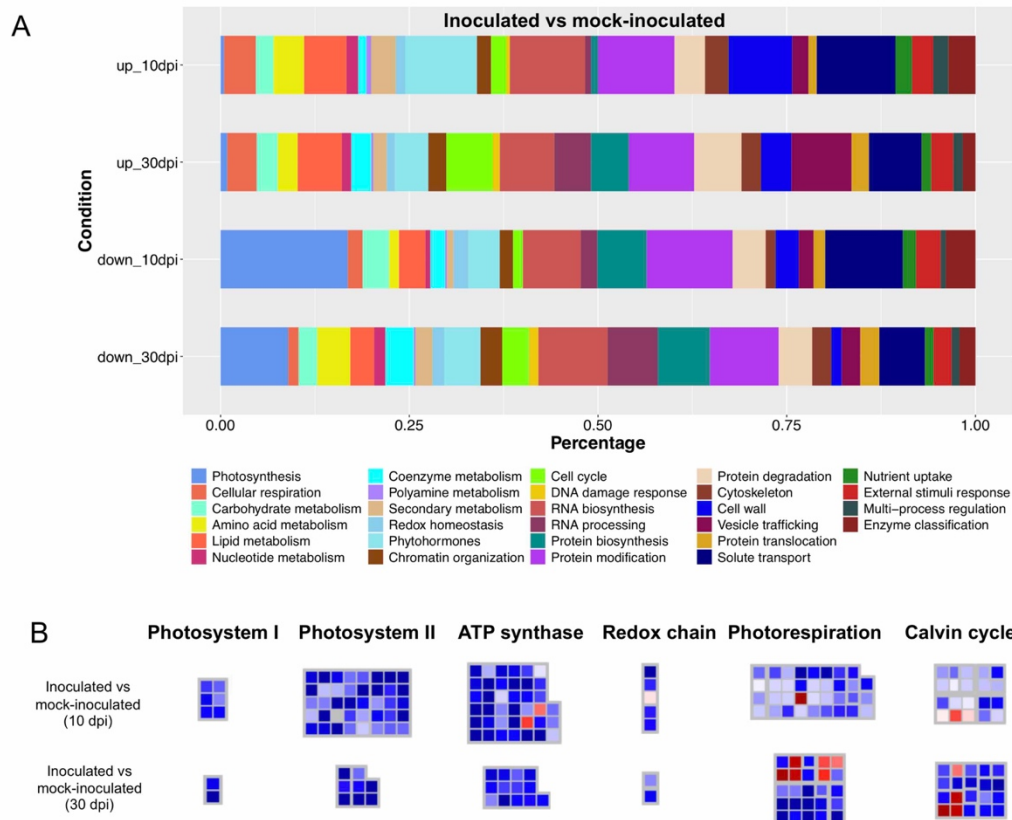

1008

1009

1010

1011

1012

1013

1014

1015

1016

1017

**Figure 5.** Overview of the transcriptional changes of *G. yamadae* inoculated apple leaves. A: All the differentially expressed genes at 10 and 30 days post-inoculation (dpi) were classified into MapMan metabolic pathways. The chart shows the percentage of up- or down- regulated genes at 10 dpi and 30 dpi classified into each pathway. B: Genes involved in the photosynthesis are significantly down-regulated in inoculated groups compared to mock inoculated groups at 10 dpi and 30 dpi. The photosynthetic apparatus related genes were defined according to MapMan bin code and the expression profiles were visualized by MapMan tool.



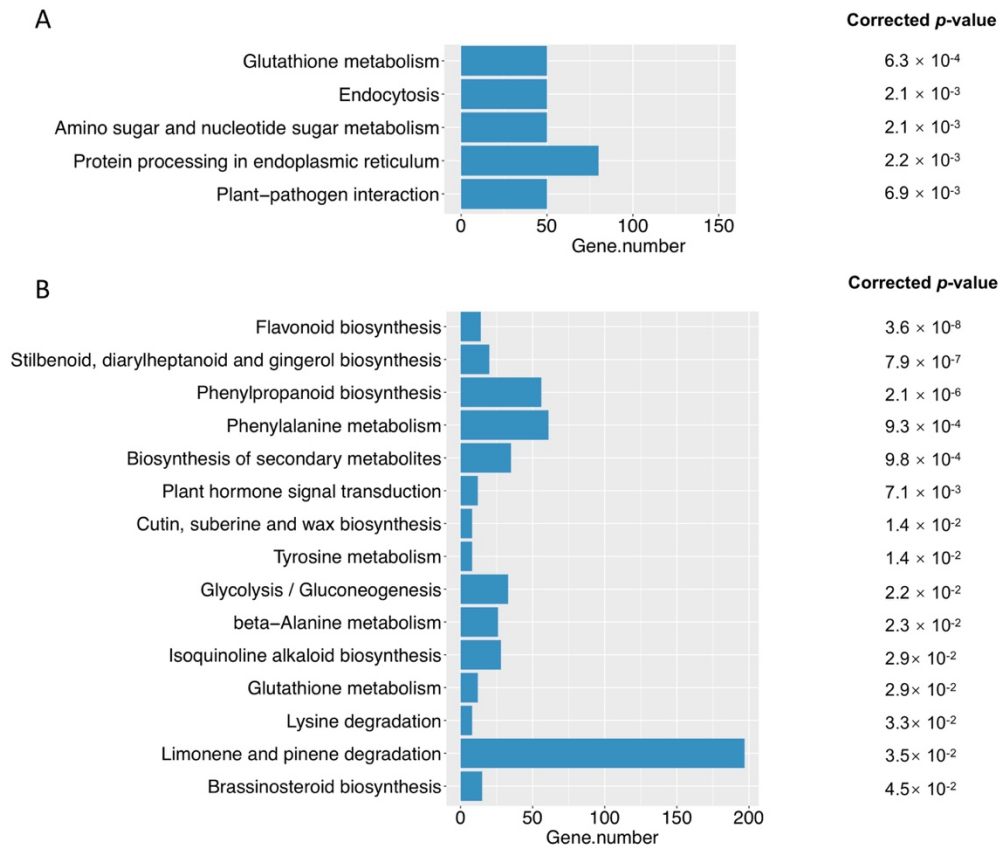

1018

1019

1020

1021

1022

1023

1024

1025

1026

**Figure 6.** The Kyoto Encyclopedia of Genes and Genomes (KEGG) pathway enrichment analysis of all up-regulated genes in inoculated apple leaves based on the hypergeometric test. A and B showing ten most enriched pathways in inoculated apple leaves at 10 and 30 days post-inoculation (dpi), respectively. Gene number refers to the genes annotated in each pathway and corrected *p*-value is the *p*-value after Benjamini and Hochberg correction. The pathways with corrected *p*-value < 0.05 were considered as significantly enriched.

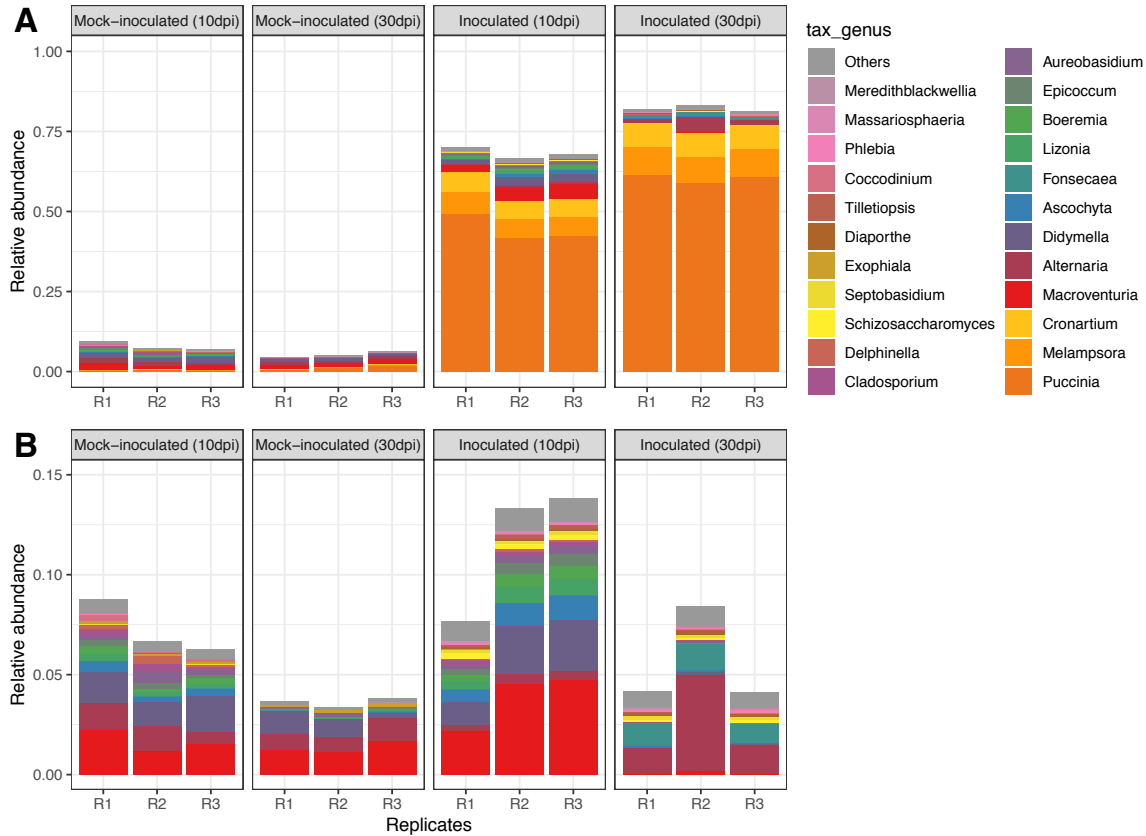

1027

1028

1029

1030

1031

1032

1033

1034

1035

1036

1037

**Figure 7.** Apple phyllosphere fungal community composition in rust inoculated and mock-inoculated conditions at 10 and 30 days post-inoculation (dpi). RNA-seq reads from apple leaves unmapped to the apple genome from each biological replicate (R1 to R3) were compared to a unigenes set built from the reads of the 12 replicates altogether. The unigenes were annotated with the JGI MycoCosm genomic resource for attribution to fungal taxonomical genus (tax\_genus) levels. A: relative abundance of reads attributed to unigenes annotated in fungal taxa. B: relative abundance of reads attributed to unigenes annotated in fungal taxa, after discarding rust taxa (order Pucciniales).

1038 **Supplementary figures.**  
1039

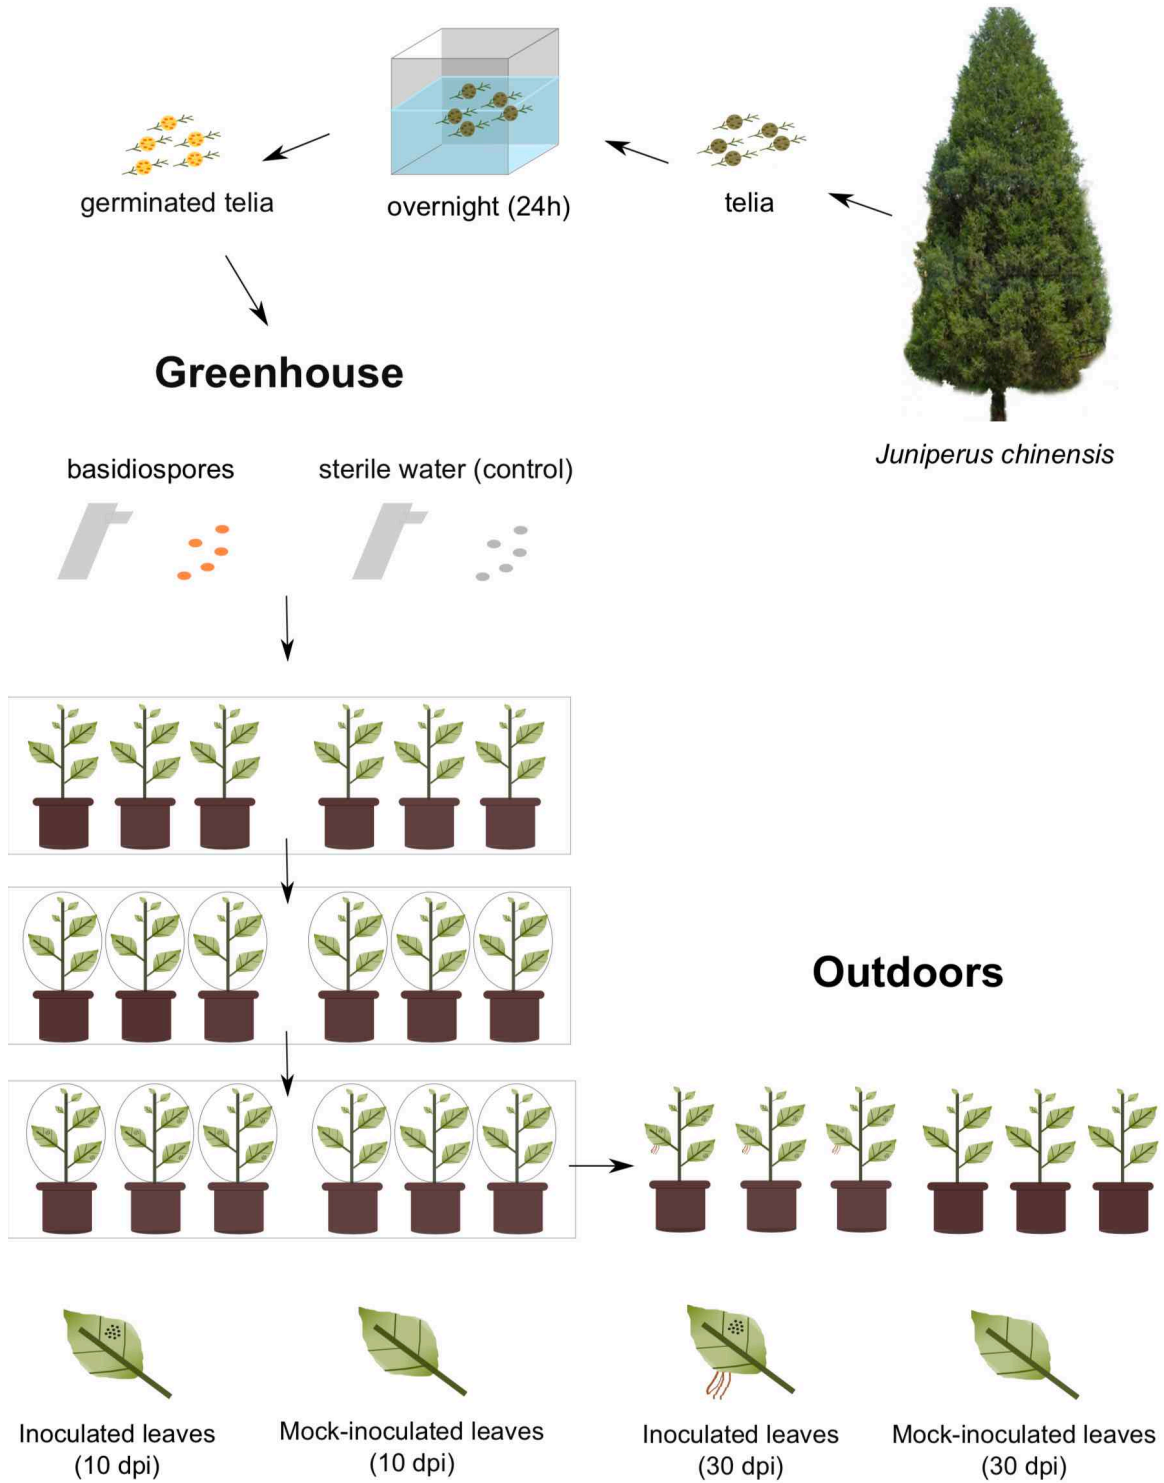

1040

1041

1042 **Figure S1.** Experimental set-up established for artificial inoculation of apple seedlings by  
1043 *Gymnosporangium yamadae*. Mature telia of *G. yamadae* were collected on wild *Juniperus*  
1044 *chinensis* trees outdoor and were placed in water overnight to ensure germination and production  
1045 of basidiospores. Two groups of 15 two-years-old apple seedlings were defined. The leaves of one  
1046 group of seedlings were spray-inoculated with basidiospores and leaves of the other group were  
1047 sprayed with sterile water as a mock-inoculated control. All the seedlings were covered with  
1048 transparent plastic bags with openings at the top to ensure air exchange and were placed in a  
1049 green-house with controlled temperature and moisture. Spermogonia formed on the upper surface  
1050 of apple leaves after 10 days post inoculation (dpi). The infected and control seedlings groups were  
1051 unbagged and moved outdoors. After 30 dpi, aecia formed on the lower surface of apple leaves.  
1052 Samples were collected from leaves at 10 and 30 dpi. Random leave pieces of similar surface than  
1053 in infected conditions were collected for the mock-inoculated controls at both time points.

1054

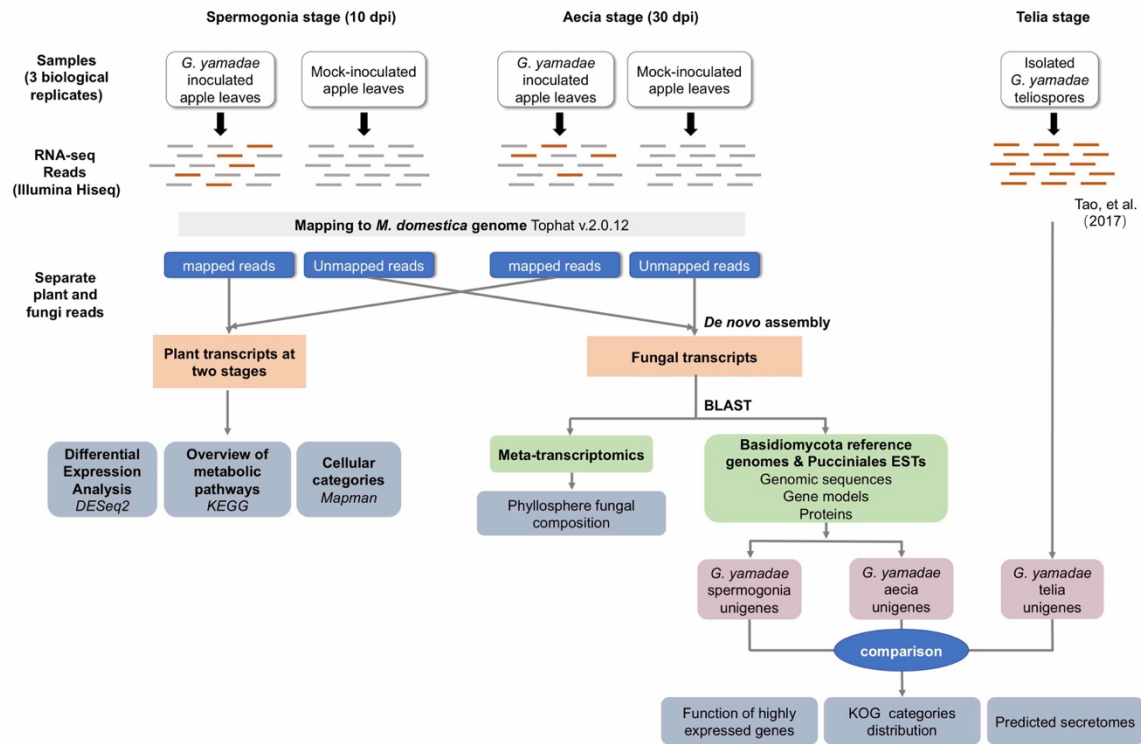

1055  
 1056  
 1057  
 1058  
 1059  
 1060  
 1061  
 1062  
 1063  
 1064  
 1065  
 1066  
 1067  
 1068  
 1069

**Figure S2.** Overall RNA-seq and bioinformatic analysis pipeline used in the study. Briefly, after appropriate cleaning, reads obtained from Illumina RNAseq of three replicates in four conditions (rust-inoculated apple leaves and mock-inoculated controls at 10 and 30 days post-inoculation, dpi) were mapped to the apple reference genome to identify plant reads. Reads were assembled into unigenes at each of the four conditions and plant transcripts were compared to reference databases and pathways and between the inoculated and mock-inoculated conditions. Reads unmapped onto the apple genome were compared to reference fungal genomic databases to retrieve candidate apple rust fungus unigenes in the inoculated 10 and 30 dpi conditions before further annotation with ad hoc dedicated tools and databases. The fungal data were also compared to a previous dataset obtained at another apple rust fungal stage (telia; Tao et al. 2017). In parallel, non-plant reads were compared to global fungal databases through a dedicated meta-transcriptomic pipeline (see methods) in order to precisely assign transcripts to given fungal taxonomical levels.



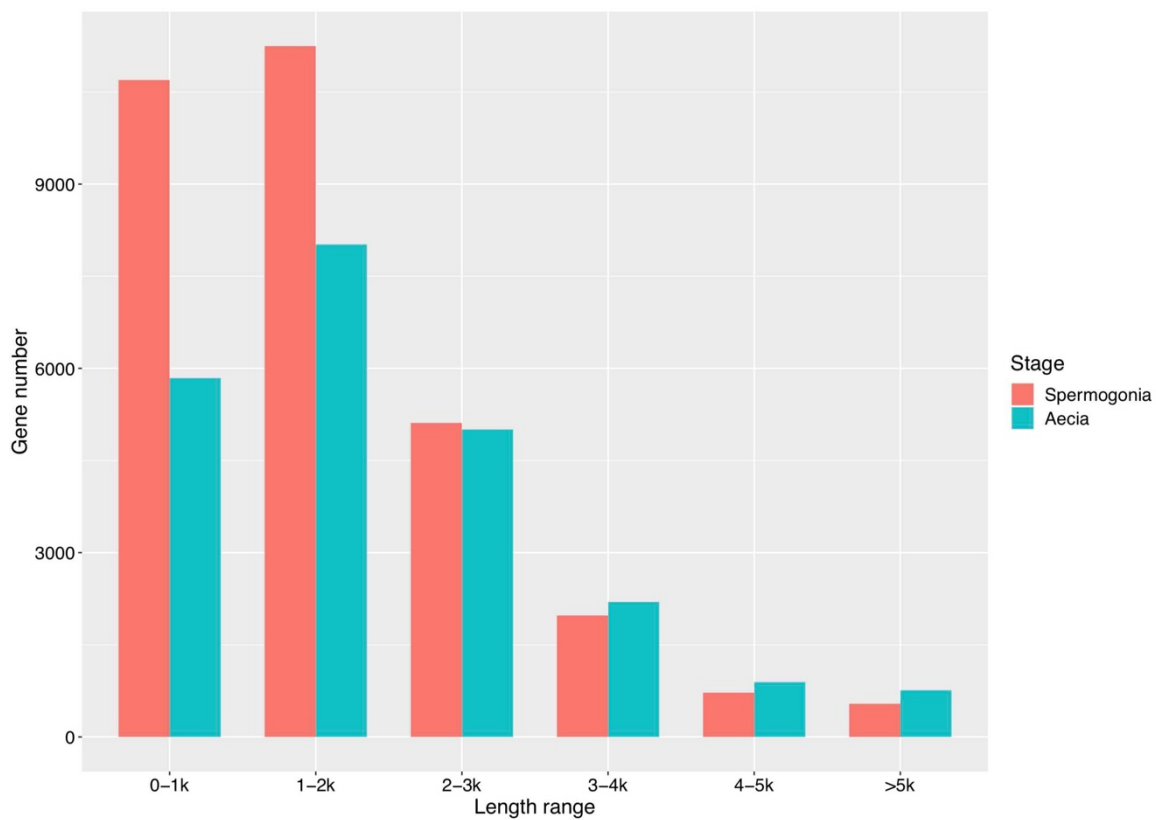

1070

1071

1072

1073

**Figure S3.** Length distribution of unigenes from spermogonia and aeica of *G. yamadae*.





1090

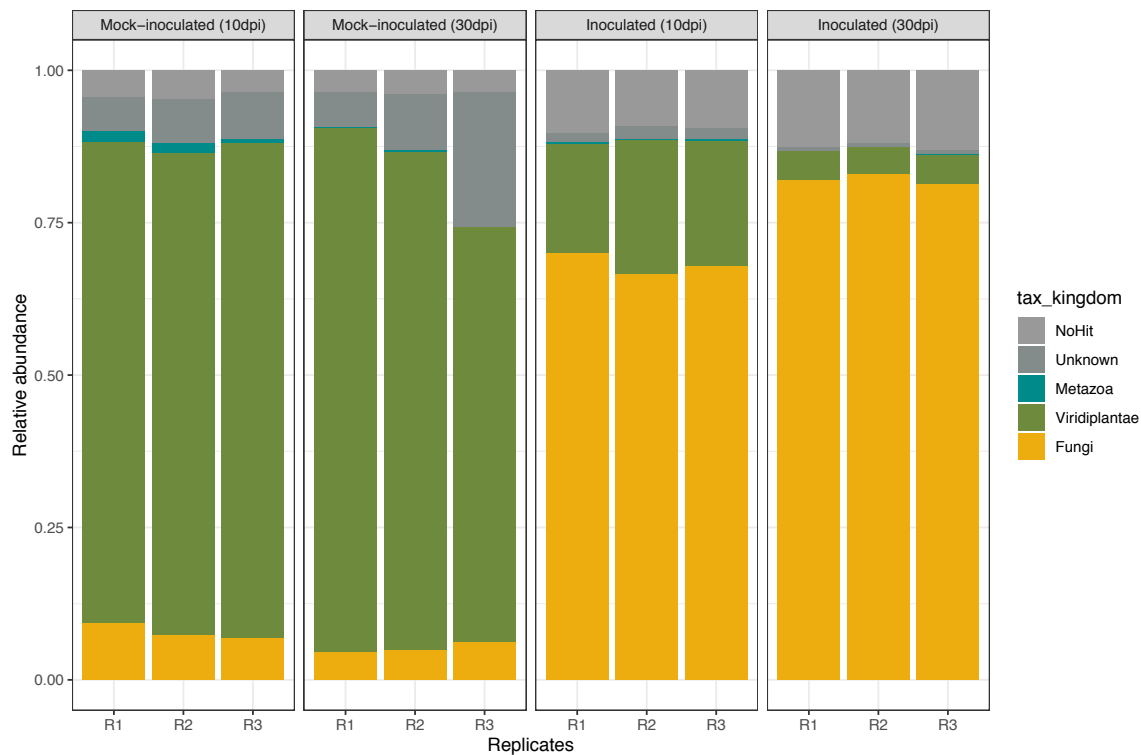

1091

1092

1093

1094

1095

1096

1097

1098

**Figure S6.** Apple phyllosphere community composition in rust inoculated and mock-inoculated conditions at 10 and 30 days post-inoculation (dpi). RNA-seq reads from apple leaves unmapped to the apple genome from each biological replicate (R1 to R3) were compared to a unigenes set built from the 12 replicates altogether. Non-fungal unigenes were annotated at the kingdom level by comparison to the NCBI non-redundant database. The figure presents the relative abundance of assigned reads in each replicate.

1099 **Table S1.** *Malus domestica* transcripts expression in *Gymnosporangium yamadae* inoculated  
1100 conditions and in mock-inoculated controls at 10 and 30 days post-inoculation (dpi) and assignment  
1101 to metabolic pathways with subsequent enrichment analysis (MapMan and KEGG enrichment).  
1102 Apple transcripts informations such as Gene\_id, chromosome, Strand, Start, End, Length are  
1103 provided. Read count and FPKM value for each gene were obtained for three biological replicates  
1104 in four conditions (Inoculated\_10dpi, Mock-inoculated\_10dpi, Inoculated\_30dpi, Mock-  
1105 inoculated\_30dpi) and differentially expressed levels between inoculated and mock-inoculated  
1106 groups at 10 dpi and 30 dpi were evaluated with DESeq2 (adjusted  $p$ -value padj <0.05). All  
1107 significantly differentially expressed genes between inoculated and mock-inoculated groups were  
1108 assigned into MapMan functional categories and KEGG pathways. KEGG pathways enrichment  
1109 tests realised with KOBAS v2.0 (hypergeometric test of KEGG pathways with Benjamini and  
1110 Hochberg corrected  $p$ -values) are also presented.

1111 **Table S2.** *Gymnosporangium yamadae* unigenes, predicted secreted proteins and identification of  
1112 specific proteins at apple infection stages. For spermogonia and aecia unigenes, Gene id, Gene  
1113 length, expression information (read count and FPKM value) for each biological replicate and  
1114 annotation results from seven public databases (NR, NT, KO, Swissprot, PFAM, GO, KOG) are  
1115 presented. For the secreted proteins predicted in spermogonia and aecia, CPL\_fam represent  
1116 CAZymes, proteases and lipases families predicted in the secretome; per C is the percentage of  
1117 cysteine content in each amino acid sequence. NLS means Nuclear Localisation Signal prediction.  
1118 Proteins from spermogonia, aecia and telia were clustered by Markov Cluster Algorithm (MCL) to  
1119 identify the proteins specific to spermogonia, aecia and apple infection (spermogonia and aecia)  
1120 stages.

1121 **Table S3.** Meta-transcriptomic analysis results. Illumina RNA-seq trimmed reads (Total reads) and  
1122 the un-mapped reads after mapping reads against the *Malus domestica* reference genome using  
1123 CLC Genomics Workbench 11.0. All un-mapped reads from the 12 replicates in the four conditions  
1124 were assembled together following a *de novo* co-assembly (Assembled unigenes) approach. The  
1125 unigenes showing blast hits with JGI-Mycocosm fungal genomes are indicated as Fungal unigenes.  
1126 The phyllosphere fungal composition for each replicate was analysed at the genus level by  
1127 determining the relative abundance of reads mapped to the annotated fungal unigenes.
